# Supplementary material for: Omega-3 fatty acid blood levels are inversely associated with cardiometabolic risk factors in HFpEF patients: the Aldo-DHF randomized controlled trial
Source: PubMed Central journal article supplement (PMC8873063; doi:10.1007/s00392-021-01925-9), 2021-08-28
Supplement: 392_2021_1925_MOESM2_ESM.pdf [file 392_2021_1925_MOESM2_ESM.pdf]

### Supplementary Table 4

Table A1: Outcome HbA1c

|                   | Coefficient $\beta$ | Std. Error | t-Value | p-Value |
|-------------------|---------------------|------------|---------|---------|
| Omega-3 Index (%) | -0.060              | 0.024      | -2.479  | 0.014   |
| ALA               | -0.107              | 0.300      | -0.356  | 0.722   |
| Sex               | 0.088               | 0.076      | 1.159   | 0.247   |
| Age (years)       | -0.001              | 0.005      | -0.171  | 0.864   |

Table A2: Outcome TG/HDL-C ratio

|                   | Coefficient $\beta$ | Std. Error | t-Value | p-Value |
|-------------------|---------------------|------------|---------|---------|
| Omega-3 Index (%) | -0.287              | 0.086      | -3.324  | 0.001   |
| ALA               | 5.100               | 1.114      | 4.577   | <0.001  |
| Sex               | 0.946               | 0.275      | 3.443   | 0.001   |
| Age (years)       | -0.001              | 0.019      | -0.061  | 0.952   |

Table A3: Outcome Triglycerides (mg/dl)

|                   | Coefficient $\beta$ | Std. Error | t-Value | p-Value |
|-------------------|---------------------|------------|---------|---------|
| Omega-3 Index (%) | -10.187             | 3.187      | -3.196  | 0.002   |
| ALA               | 179.460             | 41.032     | 4.374   | <0.001  |
| Sex               | 15.475              | 10.133     | 1.527   | 0.128   |
| Age (years)       | -0.059              | 0.701      | -0.084  | 0.933   |

Table A4: Outcome Non-HDL-C (mg/dl)

|                   | Coefficient $\beta$ | Std. Error | t-Value | p-Value |
|-------------------|---------------------|------------|---------|---------|
| Omega-3 Index (%) | -2.474              | 1.481      | -1.671  | 0.096   |
| ALA               | 5.119               | 18.780     | 0.273   | 0.785   |
| Sex               | -13.794             | 4.708      | -2.930  | 0.004   |
| Age (years)       | -0.364              | 0.326      | -1.116  | 0.265   |

Table A5: Outcome Body mass index

|                   | Coefficient $\beta$ | Std. Error | t-Value | p-Value |
|-------------------|---------------------|------------|---------|---------|
| Omega-3 Index (%) | -0.269              | 0.112      | -2.410  | 0.016   |

|             |        |       |        |       |
|-------------|--------|-------|--------|-------|
| ALA         | -0.738 | 1.424 | -0.518 | 0.605 |
| Sex         | 0.250  | 0.356 | 0.703  | 0.483 |
| Age (years) | -0.028 | 0.025 | -1.153 | 0.250 |

*Table A6: Outcome Waist Circumference, (cm)*

|                   | Coefficient $\beta$ | Std. Error | t-Value | p-Value |
|-------------------|---------------------|------------|---------|---------|
| Omega-3 Index (%) | -0.942              | 0.301      | -3.131  | 0.002   |
| ALA               | 2.701               | 3.839      | 0.704   | 0.482   |
| Sex               | 10.673              | 0.959      | 11.128  | <0.001  |
| Age (years)       | 0.076               | 0.067      | 1.143   | 0.254   |

*Table A7: Outcome Waist-to-height ratio*

|                   | Coefficient $\beta$ | Std. Error | t-Value | p-Value |
|-------------------|---------------------|------------|---------|---------|
| Omega-3 Index (%) | -0.004              | 0.002      | -2.131  | 0.034   |
| ALA               | 0.010               | 0.025      | 0.393   | 0.694   |
| Sex               | 0.045               | 0.006      | 7.269   | <0.001  |
| Age (years)       | -0.001              | 0.000      | -2.928  | 0.004   |

*Table A8: Outcome E/e'*

|                   | Coefficient $\beta$ | Std. Error | t-Value | p-Value |
|-------------------|---------------------|------------|---------|---------|
| Omega-3 Index (%) | 0.016               | 0.048      | 0.342   | 0.732   |
| ALA               | 1.144               | 0.605      | 1.890   | 0.060   |
| Sex               | 0.021               | 0.151      | 0.139   | 0.890   |
| Age (years)       | -0.048              | 0.011      | -4.556  | <0.001  |

*Table A9: Outcome E/A velocity ratio*

|                   | Coefficient $\beta$ | Std. Error | t-Value | p-Value |
|-------------------|---------------------|------------|---------|---------|
| Omega-3 Index (%) | -0.003              | 0.011      | -0.247  | 0.805   |
| ALA               | 0.114               | 0.137      | 0.837   | 0.403   |
| Sex               | -0.006              | 0.034      | -0.191  | 0.849   |

|             |        |       |        |       |
|-------------|--------|-------|--------|-------|
| Age (years) | -0.004 | 0.002 | -1.804 | 0.072 |
|-------------|--------|-------|--------|-------|

Table A10: Outcome Deceleration time, ms

|                   | Coefficient $\beta$ | Std. Error | t-Value | p-Value |
|-------------------|---------------------|------------|---------|---------|
| Omega-3 Index (%) | 0.393               | 1.967      | 0.200   | 0.842   |
| ALA               | -13.277             | 25.067     | -0.530  | 0.597   |
| Sex               | 9.927               | 6.266      | 1.584   | 0.114   |
| Age (years)       | 0.416               | 0.435      | 0.956   | 0.340   |

Table A11: Outcome NT-proBNP, ng/L

|                   | Coefficient $\beta$ | Std. Error | t-Value | p-Value |
|-------------------|---------------------|------------|---------|---------|
| Omega-3 Index (%) | 0.003               | 0.013      | 0.256   | 0.798   |
| ALA               | 0.386               | 0.168      | 2.298   | 0.022   |
| Sex               | -0.033              | 0.042      | -0.778  | 0.437   |
| Age (years)       | 0.019               | 0.003      | 6.551   | <0.001  |

Table A12: Outcome Follow-Up HbA1c

|                   | Coefficient $\beta$ | Std. Error | t-Value | p-Value |
|-------------------|---------------------|------------|---------|---------|
| Omega-3 Index (%) | -0.020              | 0.031      | -0.641  | 0.522   |
| ALA               | 0.392               | 0.386      | 1.016   | 0.310   |
| Sex               | 0.228               | 0.096      | 2.365   | 0.019   |
| Age (years)       | -0.002              | 0.007      | -0.313  | 0.754   |

Table A13: Outcome Follow-Up TG/HDL-C ratio

|                   | Coefficient $\beta$ | Std. Error | t-Value | p-Value |
|-------------------|---------------------|------------|---------|---------|
| Omega-3 Index (%) | -0.135              | 0.129      | -1.046  | 0.296   |
| ALA               | 3.613               | 1.622      | 2.228   | 0.026   |
| Sex               | 1.482               | 0.405      | 3.658   | <0.001  |
| Age (years)       | -0.037              | 0.028      | -1.310  | 0.191   |

Table A14: Outcome Follow-Up Triglycerides (mg/dl)

|  | Coefficient $\beta$ | Std. Error | t-Value | p-Value |
|--|---------------------|------------|---------|---------|
|--|---------------------|------------|---------|---------|

|                   |        |        |        |       |
|-------------------|--------|--------|--------|-------|
| Omega-3 Index (%) | -2.459 | 3.802  | -0.647 | 0.518 |
| ALA               | 82.211 | 47.825 | 1.719  | 0.086 |
| Sex               | 29.402 | 11.951 | 2.460  | 0.014 |
| Age (years)       | -0.940 | 0.826  | -1.139 | 0.255 |

*Table A15: Outcome Follow-Up Non-HDL-C (mg/dl)*

|                   | Coefficient $\beta$ | Std. Error | t-Value | p-Value |
|-------------------|---------------------|------------|---------|---------|
| Omega-3 Index (%) | -1.416              | 1.536      | -0.922  | 0.357   |
| ALA               | -19.073             | 19.335     | -0.986  | 0.325   |
| Sex               | -11.282             | 4.831      | -2.335  | 0.020   |
| Age (years)       | -0.447              | 0.334      | -1.338  | 0.182   |

*Table A16: Outcome Follow-Up Body mass index*

|                   | Coefficient $\beta$ | Std. Error | t-Value | p-Value |
|-------------------|---------------------|------------|---------|---------|
| Omega-3 Index (%) | -0.274              | 0.122      | -2.243  | 0.026   |
| ALA               | -0.350              | 1.543      | -0.227  | 0.821   |
| Sex               | 0.218               | 0.385      | 0.564   | 0.573   |
| Age (years)       | -0.043              | 0.027      | -1.616  | 0.107   |

*Table A17: Outcome Follow-Up Waist Circumference, (cm)*

|                   | Coefficient $\beta$ | Std. Error | t-Value | p-Value |
|-------------------|---------------------|------------|---------|---------|
| Omega-3 Index (%) | -1.020              | 0.329      | -3.103  | 0.002   |
| ALA               | 0.560               | 4.105      | 0.136   | 0.892   |
| Sex               | 11.372              | 1.027      | 11.075  | <0.001  |
| Age (years)       | -0.023              | 0.071      | -0.321  | 0.748   |

*Table A18: Outcome Follow-Up Waist-to-height ratio*

|                   | Coefficient $\beta$ | Std. Error | t-Value | p-Value |
|-------------------|---------------------|------------|---------|---------|
| Omega-3 Index (%) | -0.006              | 0.002      | -3.246  | 0.001   |
| ALA               | -0.023              | 0.025      | -0.922  | 0.357   |

|             |       |       |       |       |
|-------------|-------|-------|-------|-------|
| Sex         | 0.018 | 0.006 | 2.902 | 0.004 |
| Age (years) | 0.001 | 0.000 | 1.814 | 0.070 |

*Table A19: Outcome Follow-Up E/e'*

|                   | Coefficient $\beta$ | Std. Error | t-Value | p-Value |
|-------------------|---------------------|------------|---------|---------|
| Omega-3 Index (%) | -0.063              | 0.054      | -1.160  | 0.247   |
| ALA               | 1.521               | 0.684      | 2.223   | 0.027   |
| Sex               | 0.198               | 0.171      | 1.158   | 0.248   |
| Age (years)       | -0.046              | 0.012      | -3.869  | <0.001  |

*Table A20: Outcome Follow-Up E/A velocity ratio*

|                   | Coefficient $\beta$ | Std. Error | t-Value | p-Value |
|-------------------|---------------------|------------|---------|---------|
| Omega-3 Index (%) | -0.001              | 0.011      | -0.136  | 0.892   |
| ALA               | 0.127               | 0.139      | 0.912   | 0.362   |
| Sex               | -0.008              | 0.035      | -0.225  | 0.822   |
| Age (years)       | -0.007              | 0.002      | -2.883  | 0.004   |

*Table A21: Outcome Follow-Up Deceleration time, ms*

|                   | Coefficient $\beta$ | Std. Error | t-Value | p-Value |
|-------------------|---------------------|------------|---------|---------|
| Omega-3 Index (%) | 4.053               | 2.074      | 1.954   | 0.051   |
| ALA               | -3.834              | 26.189     | -0.146  | 0.884   |
| Sex               | 9.719               | 6.537      | 1.487   | 0.138   |
| Age (years)       | 1.147               | 0.453      | 2.534   | 0.012   |

*Table A22: Outcome Follow-Up NT-proBNP, ng/L*

|                   | Coefficient $\beta$ | Std. Error | t-Value | p-Value |
|-------------------|---------------------|------------|---------|---------|
| Omega-3 Index (%) | -0.040              | 0.033      | -1.241  | 0.215   |
| ALA               | 1.034               | 0.398      | 2.596   | 0.010   |
| Sex               | -0.053              | 0.101      | -0.528  | 0.598   |
| Age (years)       | 0.055               | 0.007      | 7.810   | <0.001  |

Table A23: Outcome Systolic blood pressure, mm Hg

|                   | Coefficient $\beta$ | Std. Error | t-Value | p-Value |
|-------------------|---------------------|------------|---------|---------|
| Omega-3 Index (%) | -0.363              | 0.570      | -0.637  | 0.524   |
| ALA               | 4.245               | 7.260      | 0.585   | 0.559   |
| Sex               | 4.591               | 1.815      | 2.530   | 0.012   |
| Age (years)       | 0.041               | 0.126      | 0.327   | 0.744   |

Table A24: Outcome Diastolic blood pressure, mm Hg

|                   | Coefficient $\beta$ | Std. Error | t-Value | p-Value |
|-------------------|---------------------|------------|---------|---------|
| Omega-3 Index (%) | -0.052              | 0.327      | -0.160  | 0.873   |
| ALA               | -2.376              | 4.163      | -0.571  | 0.569   |
| Sex               | 2.224               | 1.041      | 2.138   | 0.033   |
| Age (years)       | -0.411              | 0.072      | -5.695  | <0.001  |

Table A25: Outcome Heart rate, min

|                   | Coefficient $\beta$ | Std. Error | t-Value | p-Value |
|-------------------|---------------------|------------|---------|---------|
| Omega-3 Index (%) | 0.192               | 0.356      | 0.540   | 0.589   |
| ALA               | 3.472               | 4.537      | 0.765   | 0.445   |
| Sex               | -1.973              | 1.134      | -1.739  | 0.083   |
| Age (years)       | -0.209              | 0.079      | -2.650  | 0.008   |

Table A26: Outcome 6 MWT, (Distance covered) meters

|                   | Coefficient $\beta$ | Std. Error | t-Value | p-Value |
|-------------------|---------------------|------------|---------|---------|
| Omega-3 Index (%) | 11.093              | 2.396      | 4.629   | <0.001  |
| ALA               | 21.369              | 31.045     | 0.688   | 0.492   |
| Sex               | 38.525              | 7.638      | 5.044   | <0.001  |
| Age (years)       | -4.413              | 0.530      | -8.323  | <0.001  |

Table A27: Outcome LDL-C (mg/dl)

|  | Coefficient $\beta$ | Std. Error | t-Value | p-Value |
|--|---------------------|------------|---------|---------|
|--|---------------------|------------|---------|---------|

|                   |         |        |        |       |
|-------------------|---------|--------|--------|-------|
| Omega-3 Index (%) | -0.260  | 1.331  | -0.195 | 0.845 |
| ALA               | -5.451  | 16.859 | -0.323 | 0.747 |
| Sex               | -12.092 | 4.226  | -2.861 | 0.004 |
| Age (years)       | -0.409  | 0.293  | -1.396 | 0.163 |

*Table A28: Outcome ASAT*

|                   | Coefficient $\beta$ | Std. Error | t-Value | p-Value |
|-------------------|---------------------|------------|---------|---------|
| Omega-3 Index (%) | -0.118              | 0.299      | -0.393  | 0.694   |
| ALA               | 0.164               | 3.803      | 0.043   | 0.966   |
| Sex               | 2.441               | 0.953      | 2.562   | 0.011   |
| Age (years)       | -0.145              | 0.066      | -2.204  | 0.028   |

*Table A29: Outcome ALAT*

|                   | Coefficient $\beta$ | Std. Error | t-Value | p-Value |
|-------------------|---------------------|------------|---------|---------|
| Omega-3 Index (%) | -0.098              | 0.450      | -0.218  | 0.828   |
| ALA               | -3.039              | 5.721      | -0.531  | 0.596   |
| Sex               | 4.154               | 1.433      | 2.898   | 0.004   |
| Age (years)       | -0.458              | 0.099      | -4.616  | <0.001  |

*Table A30: Outcome GGT*

|                   | Coefficient $\beta$ | Std. Error | t-Value | p-Value |
|-------------------|---------------------|------------|---------|---------|
| Omega-3 Index (%) | -2.388              | 1.238      | -1.930  | 0.054   |
| ALA               | 0.691               | 15.730     | 0.044   | 0.965   |
| Sex               | 9.590               | 3.941      | 2.433   | 0.015   |
| Age (years)       | -0.465              | 0.273      | -1.702  | 0.089   |

*Table A31: Outcome LV ejection fraction, %*

|                   | Coefficient $\beta$ | Std. Error | t-Value | p-Value |
|-------------------|---------------------|------------|---------|---------|
| Omega-3 Index (%) | 0.987               | 0.239      | 4.136   | <0.001  |
| ALA               | -3.849              | 3.043      | -1.265  | 0.207   |
| Sex               | -2.091              | 0.761      | -2.749  | 0.006   |
| Age (years)       | 0.048               | 0.053      | 0.911   | 0.363   |

Table A32: Outcome VO2peak

|                   | Coefficient $\beta$ | Std. Error | t-Value | p-Value |
|-------------------|---------------------|------------|---------|---------|
| Omega-3 Index (%) | 0.114               | 0.099      | 1.153   | 0.250   |
| ALA               | 0.349               | 1.263      | 0.277   | 0.782   |
| Sex               | 2.218               | 0.316      | 7.027   | <0.001  |
| Age (years)       | -0.101              | 0.022      | -4.587  | <0.001  |

Table A33: Outcome Follow-Up Systolic blood pressure, mm Hg

|                   | Coefficient $\beta$ | Std. Error | t-Value | p-Value |
|-------------------|---------------------|------------|---------|---------|
| Omega-3 Index (%) | -0.284              | 0.552      | -0.516  | 0.606   |
| ALA               | 2.873               | 6.927      | 0.415   | 0.679   |
| Sex               | 4.427               | 1.731      | 2.558   | 0.011   |
| Age (years)       | -0.140              | 0.120      | -1.166  | 0.244   |

Table A34: Outcome Follow-Up Diastolic blood pressure, mm Hg

|                   | Coefficient $\beta$ | Std. Error | t-Value | p-Value |
|-------------------|---------------------|------------|---------|---------|
| Omega-3 Index (%) | -0.341              | 0.330      | -1.033  | 0.302   |
| ALA               | -3.830              | 4.138      | -0.926  | 0.355   |
| Sex               | 0.634               | 1.034      | 0.613   | 0.540   |
| Age (years)       | -0.413              | 0.072      | -5.765  | <0.001  |

Table A35: Outcome Follow-Up Heart rate, min

|                   | Coefficient $\beta$ | Std. Error | t-Value | p-Value |
|-------------------|---------------------|------------|---------|---------|
| Omega-3 Index (%) | -0.495              | 0.365      | -1.356  | 0.176   |
| ALA               | -1.565              | 4.579      | -0.342  | 0.733   |
| Sex               | 0.067               | 1.144      | 0.058   | 0.954   |
| Age (years)       | -0.052              | 0.079      | -0.659  | 0.510   |

Table A36: Outcome Follow-Up 6 MWT, (Distance covered) meters

|  | Coefficient $\beta$ | Std. Error | t-Value | p-Value |
|--|---------------------|------------|---------|---------|
|--|---------------------|------------|---------|---------|



|                   |        |        |        |        |
|-------------------|--------|--------|--------|--------|
| Omega-3 Index (%) | 15.614 | 2.913  | 5.360  | <0.001 |
| ALA               | 19.483 | 36.117 | 0.539  | 0.590  |
| Sex               | 33.617 | 9.162  | 3.669  | <0.001 |
| Age (years)       | -5.204 | 0.639  | -8.149 | <0.001 |

*Table A37: Outcome Follow-Up LDL-C (mg/dl)*

|                   | Coefficient $\beta$ | Std. Error | t-Value | p-Value |
|-------------------|---------------------|------------|---------|---------|
| Omega-3 Index (%) | 0.116               | 1.366      | 0.085   | 0.933   |
| ALA               | -25.786             | 17.145     | -1.504  | 0.133   |
| Sex               | -12.819             | 4.295      | -2.985  | 0.003   |
| Age (years)       | -0.283              | 0.296      | -0.954  | 0.341   |

*Table A38: Outcome Follow-Up ASAT*

|                   | Coefficient $\beta$ | Std. Error | t-Value | p-Value |
|-------------------|---------------------|------------|---------|---------|
| Omega-3 Index (%) | 0.042               | 0.301      | 0.139   | 0.889   |
| ALA               | 3.110               | 3.763      | 0.826   | 0.409   |
| Sex               | 2.731               | 0.942      | 2.900   | 0.004   |
| Age (years)       | -0.159              | 0.065      | -2.438  | 0.015   |

*Table A39: Outcome Follow-Up ALAT*

|                   | Coefficient $\beta$ | Std. Error | t-Value | p-Value |
|-------------------|---------------------|------------|---------|---------|
| Omega-3 Index (%) | -0.061              | 0.432      | -0.141  | 0.888   |
| ALA               | 2.238               | 5.408      | 0.414   | 0.679   |
| Sex               | 3.883               | 1.350      | 2.875   | 0.004   |
| Age (years)       | -0.531              | 0.094      | -5.677  | <0.001  |

*Table A40: Outcome Follow-Up GGT*

|                   | Coefficient $\beta$ | Std. Error | t-Value | p-Value |
|-------------------|---------------------|------------|---------|---------|
| Omega-3 Index (%) | -0.304              | 1.231      | -0.247  | 0.805   |
| ALA               | 8.413               | 15.371     | 0.547   | 0.584   |
| Sex               | 7.842               | 3.851      | 2.036   | 0.042   |
| Age (years)       | -0.558              | 0.267      | -2.090  | 0.037   |

Table A41: Outcome Follow-Up LV ejection fraction, %

|                   | Coefficient $\beta$ | Std. Error | t-Value | p-Value |
|-------------------|---------------------|------------|---------|---------|
| Omega-3 Index (%) | 0.698               | 0.259      | 2.696   | 0.007   |
| ALA               | -0.826              | 3.268      | -0.253  | 0.801   |
| Sex               | -1.961              | 0.816      | -2.404  | 0.017   |
| Age (years)       | 0.038               | 0.056      | 0.678   | 0.498   |

Table A42: Outcome Follow-Up VO2peak

|                   | Coefficient $\beta$ | Std. Error | t-Value | p-Value |
|-------------------|---------------------|------------|---------|---------|
| Omega-3 Index (%) | 0.399               | 0.140      | 2.846   | 0.005   |
| ALA               | 1.822               | 1.783      | 1.022   | 0.307   |
| Sex               | 2.556               | 0.443      | 5.772   | <0.001  |
| Age (years)       | -0.141              | 0.031      | -4.570  | <0.001  |

Table B1: Outcome HbA1c

|             | Coefficient $\beta$ | Std. Error | t-Value | p-Value |
|-------------|---------------------|------------|---------|---------|
| ALA         | -0.231              | 0.312      | -0.739  | 0.460   |
| EPA         | 0.091               | 0.111      | 0.816   | 0.415   |
| DHA         | -0.114              | 0.044      | -2.615  | 0.009   |
| Sex         | 0.086               | 0.076      | 1.134   | 0.258   |
| Age (years) | -0.001              | 0.005      | -0.101  | 0.920   |

Table B2: Outcome TG/HDL-C ratio

|             | Coefficient $\beta$ | Std. Error | t-Value | p-Value |
|-------------|---------------------|------------|---------|---------|
| ALA         | 5.809               | 1.154      | 5.036   | <0.001  |
| EPA         | -1.177              | 0.403      | -2.922  | 0.004   |
| DHA         | -0.022              | 0.156      | -0.142  | 0.887   |
| Sex         | 0.954               | 0.273      | 3.488   | 0.001   |
| Age (years) | -0.003              | 0.019      | -0.159  | 0.874   |

*Table B3: Outcome Triglycerides (mg/dl)*

|             | Coefficient $\beta$ | Std. Error | t-Value | p-Value |
|-------------|---------------------|------------|---------|---------|
| ALA         | 191.793             | 42.708     | 4.491   | <0.001  |
| EPA         | -25.918             | 14.949     | -1.734  | 0.084   |
| DHA         | -5.892              | 5.781      | -1.019  | 0.309   |
| Sex         | 15.624              | 10.133     | 1.542   | 0.124   |
| Age (years) | -0.090              | 0.701      | -0.128  | 0.898   |

*Table B4: Outcome Non-HDL-C (mg/dl)*

|             | Coefficient $\beta$ | Std. Error | t-Value | p-Value |
|-------------|---------------------|------------|---------|---------|
| ALA         | -2.346              | 19.489     | -0.120  | 0.904   |
| EPA         | 6.873               | 6.908      | 0.995   | 0.320   |
| DHA         | -5.681              | 2.677      | -2.122  | 0.034   |
| Sex         | -13.916             | 4.703      | -2.959  | 0.003   |
| Age (years) | -0.345              | 0.326      | -1.056  | 0.291   |

*Table B5: Outcome Body mass index*

|             | Coefficient $\beta$ | Std. Error | t-Value | p-Value |
|-------------|---------------------|------------|---------|---------|
| ALA         | 0.008               | 1.475      | 0.005   | 0.996   |
| EPA         | -1.239              | 0.523      | -2.369  | 0.018   |
| DHA         | 0.021               | 0.201      | 0.103   | 0.918   |
| Sex         | 0.260               | 0.355      | 0.734   | 0.463   |
| Age (years) | -0.030              | 0.025      | -1.229  | 0.220   |

*Table B6: Outcome Waist Circumference, (cm)*

|             | Coefficient $\beta$ | Std. Error | t-Value | p-Value |
|-------------|---------------------|------------|---------|---------|
| ALA         | 4.218               | 3.984      | 1.059   | 0.290   |
| EPA         | -2.926              | 1.412      | -2.072  | 0.039   |
| DHA         | -0.378              | 0.543      | -0.697  | 0.486   |
| Sex         | 10.692              | 0.958      | 11.160  | <0.001  |
| Age (years) | 0.072               | 0.067      | 1.089   | 0.277   |

Table B7: Outcome Waist-to-height ratio

|             | Coefficient $\beta$ | Std. Error | t-Value | p-Value |
|-------------|---------------------|------------|---------|---------|
| ALA         | 0.025               | 0.025      | 0.988   | 0.324   |
| EPA         | -0.024              | 0.009      | -2.673  | 0.008   |
| DHA         | 0.002               | 0.003      | 0.569   | 0.570   |
| Sex         | 0.045               | 0.006      | 7.340   | <0.001  |
| Age (years) | -0.001              | 0.000      | -3.028  | 0.003   |

Table B8: Outcome E/e'

|             | Coefficient $\beta$ | Std. Error | t-Value | p-Value |
|-------------|---------------------|------------|---------|---------|
| ALA         | 1.402               | 0.628      | 2.233   | 0.026   |
| EPA         | -0.312              | 0.223      | -1.402  | 0.162   |
| DHA         | 0.123               | 0.086      | 1.431   | 0.153   |
| Sex         | 0.025               | 0.151      | 0.162   | 0.871   |
| Age (years) | -0.048              | 0.011      | -4.619  | <0.001  |

Table B9: Outcome E/A velocity ratio

|             | Coefficient $\beta$ | Std. Error | t-Value | p-Value |
|-------------|---------------------|------------|---------|---------|
| ALA         | 0.074               | 0.142      | 0.519   | 0.604   |
| EPA         | 0.049               | 0.050      | 0.988   | 0.324   |
| DHA         | -0.019              | 0.019      | -1.013  | 0.312   |
| Sex         | -0.007              | 0.034      | -0.215  | 0.830   |
| Age (years) | -0.004              | 0.002      | -1.763  | 0.079   |

Table B10: Outcome Deceleration time, ms

|             | Coefficient $\beta$ | Std. Error | t-Value | p-Value |
|-------------|---------------------|------------|---------|---------|
| ALA         | -1.764              | 25.981     | -0.068  | 0.946   |
| EPA         | -14.313             | 9.218      | -1.553  | 0.121   |
| DHA         | 5.132               | 3.547      | 1.447   | 0.149   |
| Sex         | 10.085              | 6.253      | 1.613   | 0.108   |
| Age (years) | 0.388               | 0.434      | 0.893   | 0.372   |

*Table B11: Outcome NT-proBNP, ng/L*

|             | Coefficient $\beta$ | Std. Error | t-Value | p-Value |
|-------------|---------------------|------------|---------|---------|
| ALA         | 0.355               | 0.174      | 2.032   | 0.043   |
| EPA         | 0.043               | 0.062      | 0.699   | 0.485   |
| DHA         | -0.009              | 0.024      | -0.384  | 0.701   |
| Sex         | -0.033              | 0.042      | -0.791  | 0.430   |
| Age (years) | 0.019               | 0.003      | 6.568   | <0.001  |

*Table B12: Outcome Follow-Up HbA1c*

|             | Coefficient $\beta$ | Std. Error | t-Value | p-Value |
|-------------|---------------------|------------|---------|---------|
| ALA         | 0.404               | 0.404      | 1.001   | 0.318   |
| EPA         | -0.035              | 0.143      | -0.248  | 0.804   |
| DHA         | -0.016              | 0.055      | -0.292  | 0.771   |
| Sex         | 0.228               | 0.097      | 2.364   | 0.019   |
| Age (years) | -0.002              | 0.007      | -0.318  | 0.751   |

*Table B13: Outcome Follow-Up TG/HDL-C ratio*

|             | Coefficient $\beta$ | Std. Error | t-Value | p-Value |
|-------------|---------------------|------------|---------|---------|
| ALA         | 3.689               | 1.696      | 2.175   | 0.030   |
| EPA         | -0.233              | 0.602      | -0.388  | 0.699   |
| DHA         | -0.113              | 0.233      | -0.486  | 0.628   |
| Sex         | 1.484               | 0.406      | 3.656   | <0.001  |
| Age (years) | -0.037              | 0.028      | -1.315  | 0.189   |

*Table B14: Outcome Follow-Up Triglycerides (mg/dl)*

|             | Coefficient $\beta$ | Std. Error | t-Value | p-Value |
|-------------|---------------------|------------|---------|---------|
| ALA         | 79.294              | 50.076     | 1.583   | 0.114   |
| EPA         | 0.843               | 17.762     | 0.047   | 0.962   |
| DHA         | -3.710              | 6.872      | -0.540  | 0.590   |
| Sex         | 29.316              | 11.974     | 2.448   | 0.015   |
| Age (years) | -0.933              | 0.828      | -1.127  | 0.260   |

Table B15: Outcome Follow-Up Non-HDL-C (mg/dl)

|             | Coefficient $\beta$ | Std. Error | t-Value | p-Value |
|-------------|---------------------|------------|---------|---------|
| ALA         | -19.422             | 20.252     | -0.959  | 0.338   |
| EPA         | -1.088              | 7.170      | -0.152  | 0.879   |
| DHA         | -1.630              | 2.771      | -0.588  | 0.557   |
| Sex         | -11.293             | 4.841      | -2.333  | 0.020   |
| Age (years) | -0.445              | 0.335      | -1.331  | 0.184   |

Table B16: Outcome Follow-Up Body mass index

|             | Coefficient $\beta$ | Std. Error | t-Value | p-Value |
|-------------|---------------------|------------|---------|---------|
| ALA         | 0.131               | 1.616      | 0.081   | 0.935   |
| EPA         | -0.850              | 0.573      | -1.483  | 0.139   |
| DHA         | -0.111              | 0.221      | -0.505  | 0.614   |
| Sex         | 0.234               | 0.386      | 0.605   | 0.545   |
| Age (years) | -0.045              | 0.027      | -1.664  | 0.097   |

Table B17: Outcome Follow-Up Waist Circumference, (cm)

|             | Coefficient $\beta$ | Std. Error | t-Value | p-Value |
|-------------|---------------------|------------|---------|---------|
| ALA         | 1.337               | 4.307      | 0.310   | 0.756   |
| EPA         | -1.973              | 1.526      | -1.293  | 0.197   |
| DHA         | -0.789              | 0.593      | -1.332  | 0.184   |
| Sex         | 11.401              | 1.029      | 11.082  | <0.001  |
| Age (years) | -0.025              | 0.071      | -0.353  | 0.725   |

Table B18: Outcome Follow-Up Waist-to-height ratio

|             | Coefficient $\beta$ | Std. Error | t-Value | p-Value |
|-------------|---------------------|------------|---------|---------|
| ALA         | -0.023              | 0.026      | -0.881  | 0.379   |
| EPA         | -0.007              | 0.009      | -0.731  | 0.465   |
| DHA         | -0.007              | 0.004      | -1.909  | 0.057   |
| Sex         | 0.018               | 0.006      | 2.894   | 0.004   |
| Age (years) | 0.001               | 0.000      | 1.810   | 0.071   |

Table B19: Outcome Follow-Up E/e'

|             | Coefficient $\beta$ | Std. Error | t-Value | p-Value |
|-------------|---------------------|------------|---------|---------|
| ALA         | 1.379               | 0.717      | 1.924   | 0.055   |
| EPA         | 0.099               | 0.254      | 0.389   | 0.698   |
| DHA         | -0.119              | 0.098      | -1.221  | 0.223   |
| Sex         | 0.193               | 0.171      | 1.128   | 0.260   |
| Age (years) | -0.045              | 0.012      | -3.828  | <0.001  |

Table B20: Outcome Follow-Up E/A velocity ratio

|             | Coefficient $\beta$ | Std. Error | t-Value | p-Value |
|-------------|---------------------|------------|---------|---------|
| ALA         | 0.117               | 0.146      | 0.803   | 0.423   |
| EPA         | 0.010               | 0.052      | 0.196   | 0.844   |
| DHA         | -0.005              | 0.020      | -0.268  | 0.789   |
| Sex         | -0.008              | 0.035      | -0.234  | 0.815   |
| Age (years) | -0.007              | 0.002      | -2.859  | 0.004   |

Table B21: Outcome Follow-Up Deceleration time, ms

|             | Coefficient $\beta$ | Std. Error | t-Value | p-Value |
|-------------|---------------------|------------|---------|---------|
| ALA         | -0.079              | 27.448     | -0.003  | 0.998   |
| EPA         | -0.087              | 9.720      | -0.009  | 0.993   |
| DHA         | 5.686               | 3.742      | 1.520   | 0.129   |
| Sex         | 9.845               | 6.550      | 1.503   | 0.134   |
| Age (years) | 1.136               | 0.454      | 2.505   | 0.013   |

Table B22: Outcome Follow-Up NT-proBNP, ng/L

|             | Coefficient $\beta$ | Std. Error | t-Value | p-Value |
|-------------|---------------------|------------|---------|---------|
| ALA         | 0.892               | 0.416      | 2.143   | 0.033   |
| EPA         | 0.129               | 0.150      | 0.859   | 0.391   |
| DHA         | -0.098              | 0.058      | -1.680  | 0.094   |
| Sex         | -0.058              | 0.101      | -0.575  | 0.566   |
| Age (years) | 0.056               | 0.007      | 7.864   | <0.001  |

Table B23: Outcome Systolic blood pressure, mm Hg

|             | Coefficient $\beta$ | Std. Error | t-Value | p-Value |
|-------------|---------------------|------------|---------|---------|
| ALA         | 4.019               | 7.550      | 0.532   | 0.595   |
| EPA         | -0.095              | 2.679      | -0.035  | 0.972   |
| DHA         | -0.476              | 1.031      | -0.462  | 0.644   |
| Sex         | 4.587               | 1.817      | 2.524   | 0.012   |
| Age (years) | 0.042               | 0.126      | 0.330   | 0.741   |

Table B24: Outcome Diastolic blood pressure, mm Hg

|             | Coefficient $\beta$ | Std. Error | t-Value | p-Value |
|-------------|---------------------|------------|---------|---------|
| ALA         | -2.955              | 4.328      | -0.683  | 0.495   |
| EPA         | 0.686               | 1.535      | 0.447   | 0.655   |
| DHA         | -0.293              | 0.591      | -0.496  | 0.620   |
| Sex         | 2.216               | 1.042      | 2.128   | 0.034   |
| Age (years) | -0.410              | 0.072      | -5.666  | <0.001  |

Table B25: Outcome Heart rate, min

|             | Coefficient $\beta$ | Std. Error | t-Value | p-Value |
|-------------|---------------------|------------|---------|---------|
| ALA         | 5.702               | 4.700      | 1.213   | 0.226   |
| EPA         | -2.650              | 1.667      | -1.589  | 0.113   |
| DHA         | 1.117               | 0.642      | 1.741   | 0.082   |
| Sex         | -1.942              | 1.131      | -1.717  | 0.087   |
| Age (years) | -0.214              | 0.079      | -2.724  | 0.007   |

Table B26: Outcome 6 MWT, (Distance covered) meters

|             | Coefficient $\beta$ | Std. Error | t-Value | p-Value |
|-------------|---------------------|------------|---------|---------|
| ALA         | 20.320              | 32.333     | 0.628   | 0.530   |
| EPA         | 13.030              | 11.287     | 1.154   | 0.249   |
| DHA         | 11.320              | 4.339      | 2.609   | 0.009   |
| Sex         | 38.512              | 7.648      | 5.035   | <0.001  |
| Age (years) | -4.410              | 0.531      | -8.301  | <0.001  |



Table B27: Outcome LDL-C (mg/dl)

|             | Coefficient $\beta$ | Std. Error | t-Value | p-Value |
|-------------|---------------------|------------|---------|---------|
| ALA         | -11.633             | 17.505     | -0.665  | 0.507   |
| EPA         | 7.541               | 6.185      | 1.219   | 0.224   |
| DHA         | -2.799              | 2.401      | -1.166  | 0.244   |
| Sex         | -12.157             | 4.222      | -2.879  | 0.004   |
| Age (years) | -0.392              | 0.293      | -1.339  | 0.181   |

Table B28: Outcome ASAT

|             | Coefficient $\beta$ | Std. Error | t-Value | p-Value |
|-------------|---------------------|------------|---------|---------|
| ALA         | -0.080              | 3.957      | -0.020  | 0.984   |
| EPA         | 0.186               | 1.407      | 0.132   | 0.895   |
| DHA         | -0.224              | 0.543      | -0.413  | 0.680   |
| Sex         | 2.437               | 0.954      | 2.554   | 0.011   |
| Age (years) | -0.145              | 0.066      | -2.190  | 0.029   |

Table B29: Outcome ALAT

|             | Coefficient $\beta$ | Std. Error | t-Value | p-Value |
|-------------|---------------------|------------|---------|---------|
| ALA         | -2.839              | 5.953      | -0.477  | 0.634   |
| EPA         | -0.359              | 2.117      | -0.169  | 0.866   |
| DHA         | -0.021              | 0.817      | -0.026  | 0.979   |
| Sex         | 4.157               | 1.436      | 2.896   | 0.004   |
| Age (years) | -0.459              | 0.100      | -4.612  | <0.001  |

Table B30: Outcome GGT

|             | Coefficient $\beta$ | Std. Error | t-Value | p-Value |
|-------------|---------------------|------------|---------|---------|
| ALA         | -7.055              | 16.307     | -0.433  | 0.665   |
| EPA         | 7.329               | 5.800      | 1.264   | 0.207   |
| DHA         | -5.697              | 2.238      | -2.545  | 0.011   |
| Sex         | 9.456               | 3.932      | 2.405   | 0.017   |
| Age (years) | -0.445              | 0.273      | -1.633  | 0.103   |

*Table B31: Outcome LV ejection fraction, %*

|             | Coefficient $\beta$ | Std. Error | t-Value | p-Value |
|-------------|---------------------|------------|---------|---------|
| ALA         | -2.461              | 3.154      | -0.780  | 0.436   |
| EPA         | -0.731              | 1.119      | -0.653  | 0.514   |
| DHA         | 1.613               | 0.431      | 3.747   | <0.001  |
| Sex         | -2.072              | 0.759      | -2.729  | 0.007   |
| Age (years) | 0.045               | 0.053      | 0.848   | 0.397   |

*Table B32: Outcome VO2peak*

|             | Coefficient $\beta$ | Std. Error | t-Value | p-Value |
|-------------|---------------------|------------|---------|---------|
| ALA         | -0.884              | 1.293      | -0.684  | 0.495   |
| EPA         | 1.698               | 0.459      | 3.703   | <0.001  |
| DHA         | -0.384              | 0.177      | -2.178  | 0.030   |
| Sex         | 2.201               | 0.311      | 7.071   | <0.001  |
| Age (years) | -0.098              | 0.022      | -4.511  | <0.001  |

*Table B33: Outcome Follow-Up Systolic blood pressure, mm Hg*

|             | Coefficient $\beta$ | Std. Error | t-Value | p-Value |
|-------------|---------------------|------------|---------|---------|
| ALA         | 0.871               | 7.259      | 0.120   | 0.905   |
| EPA         | 2.015               | 2.571      | 0.784   | 0.434   |
| DHA         | -1.045              | 0.994      | -1.051  | 0.294   |
| Sex         | 4.358               | 1.733      | 2.515   | 0.012   |
| Age (years) | -0.134              | 0.120      | -1.118  | 0.264   |

*Table B34: Outcome Follow-Up Diastolic blood pressure, mm Hg*

|             | Coefficient $\beta$ | Std. Error | t-Value | p-Value |
|-------------|---------------------|------------|---------|---------|
| ALA         | -3.614              | 4.341      | -0.832  | 0.406   |
| EPA         | -0.611              | 1.538      | -0.397  | 0.691   |
| DHA         | -0.280              | 0.594      | -0.471  | 0.638   |
| Sex         | 0.641               | 1.036      | 0.619   | 0.536   |
| Age (years) | -0.413              | 0.072      | -5.759  | <0.001  |

Table B35: Outcome Follow-Up Heart rate, min

|             | Coefficient $\beta$ | Std. Error | t-Value | p-Value |
|-------------|---------------------|------------|---------|---------|
| ALA         | -1.167              | 4.803      | -0.243  | 0.808   |
| EPA         | -0.984              | 1.701      | -0.578  | 0.563   |
| DHA         | -0.375              | 0.658      | -0.571  | 0.568   |
| Sex         | 0.080               | 1.147      | 0.070   | 0.944   |
| Age (years) | -0.053              | 0.079      | -0.672  | 0.502   |

Table B36: Outcome Follow-Up 6 MWT, (Distance covered) meters

|             | Coefficient $\beta$ | Std. Error | t-Value | p-Value |
|-------------|---------------------|------------|---------|---------|
| ALA         | 23.908              | 38.016     | 0.629   | 0.53    |
| EPA         | 11.563              | 13.489     | 0.857   | 0.392   |
| DHA         | 18.123              | 5.259      | 3.446   | 0.001   |
| Sex         | 33.828              | 9.191      | 3.681   | <0.001  |
| Age (years) | -5.220              | 0.641      | -8.147  | <0.001  |

Table B37: Outcome Follow-Up LDL-C (mg/dl)

|             | Coefficient $\beta$ | Std. Error | t-Value | p-Value |
|-------------|---------------------|------------|---------|---------|
| ALA         | -22.815             | 17.955     | -1.271  | 0.205   |
| EPA         | -3.360              | 6.356      | -0.529  | 0.597   |
| DHA         | 1.243               | 2.462      | 0.505   | 0.614   |
| Sex         | -12.724             | 4.302      | -2.957  | 0.003   |
| Age (years) | -0.291              | 0.297      | -0.981  | 0.327   |

Table B38: Outcome Follow-Up ASAT

|             | Coefficient $\beta$ | Std. Error | t-Value | p-Value |
|-------------|---------------------|------------|---------|---------|
| ALA         | 3.269               | 3.945      | 0.829   | 0.408   |
| EPA         | -0.141              | 1.397      | -0.101  | 0.920   |
| DHA         | 0.104               | 0.541      | 0.192   | 0.848   |
| Sex         | 2.736               | 0.944      | 2.900   | 0.004   |
| Age (years) | -0.160              | 0.065      | -2.438  | 0.015   |

*Table B39: Outcome Follow-Up ALAT*

|             | Coefficient $\beta$ | Std. Error | t-Value | p-Value |
|-------------|---------------------|------------|---------|---------|
| ALA         | 2.247               | 5.670      | 0.396   | 0.692   |
| EPA         | -0.075              | 2.002      | -0.037  | 0.970   |
| DHA         | -0.061              | 0.775      | -0.079  | 0.937   |
| Sex         | 3.883               | 1.353      | 2.869   | 0.004   |
| Age (years) | -0.531              | 0.094      | -5.662  | <0.001  |

*Table B40: Outcome Follow-Up GGT*

|             | Coefficient $\beta$ | Std. Error | t-Value | p-Value |
|-------------|---------------------|------------|---------|---------|
| ALA         | 3.010               | 16.099     | 0.187   | 0.852   |
| EPA         | 5.948               | 5.722      | 1.039   | 0.299   |
| DHA         | -2.338              | 2.215      | -1.056  | 0.292   |
| Sex         | 7.686               | 3.852      | 1.996   | 0.047   |
| Age (years) | -0.542              | 0.267      | -2.030  | 0.043   |

*Table B41: Outcome Follow-Up LV ejection fraction, %*

|             | Coefficient $\beta$ | Std. Error | t-Value | p-Value |
|-------------|---------------------|------------|---------|---------|
| ALA         | 0.933               | 3.412      | 0.273   | 0.785   |
| EPA         | -1.310              | 1.208      | -1.084  | 0.279   |
| DHA         | 1.393               | 0.465      | 2.995   | 0.003   |
| Sex         | -1.902              | 0.814      | -2.336  | 0.020   |
| Age (years) | 0.033               | 0.056      | 0.592   | 0.554   |

*Table B42: Outcome Follow-Up VO<sub>2</sub>peak*

|             | Coefficient $\beta$ | Std. Error | t-Value | p-Value |
|-------------|---------------------|------------|---------|---------|
| ALA         | 0.927               | 1.865      | 0.497   | 0.620   |
| EPA         | 1.439               | 0.654      | 2.201   | 0.028   |
| DHA         | 0.090               | 0.255      | 0.352   | 0.725   |
| Sex         | 2.522               | 0.442      | 5.701   | <0.001  |
| Age (years) | -0.137              | 0.031      | -4.456  | <0.001  |

*Table C1: Male Subgroup, Outcome HbA1c*

|                   | Coefficient $\beta$ | Std. Error | t-Value | p-Value |
|-------------------|---------------------|------------|---------|---------|
| Omega-3 Index (%) | -0.065              | 0.04       | -1.654  | 0.100   |
| ALA               | -0.253              | 0.51       | -0.495  | 0.621   |

*Table C2: Male Subgroup, Outcome TG/HDL-C ratio*

|                   | Coefficient $\beta$ | Std. Error | t-Value | p-Value |
|-------------------|---------------------|------------|---------|---------|
| Omega-3 Index (%) | -0.458              | 0.136      | -3.381  | 0.001   |
| ALA               | 6.769               | 1.779      | 3.805   | <0.001  |

*Table C3: Male Subgroup, Outcome Triglycerides (mg/dl)*

|                   | Coefficient $\beta$ | Std. Error | t-Value | p-Value |
|-------------------|---------------------|------------|---------|---------|
| Omega-3 Index (%) | -17.675             | 4.832      | -3.658  | <0.001  |
| ALA               | 238.157             | 63.421     | 3.755   | <0.001  |

*Table C4: Male Subgroup, Outcome Non-HDL-C (mg/dl)*

|                   | Coefficient $\beta$ | Std. Error | t-Value | p-Value |
|-------------------|---------------------|------------|---------|---------|
| Omega-3 Index (%) | -6.138              | 2.008      | -3.057  | 0.003   |
| ALA               | 9.286               | 26.470     | 0.351   | 0.726   |

*Table C5: Male Subgroup, Outcome Body mass index*

|                   | Coefficient $\beta$ | Std. Error | t-Value | p-Value |
|-------------------|---------------------|------------|---------|---------|
| Omega-3 Index (%) | -0.135              | 0.146      | -0.930  | 0.353   |
| ALA               | -0.928              | 1.926      | -0.482  | 0.630   |

*Table C6: Male Subgroup, Outcome Waist Circumference, (cm)*

|                   | Coefficient $\beta$ | Std. Error | t-Value | p-Value |
|-------------------|---------------------|------------|---------|---------|
| Omega-3 Index (%) | -0.313              | 0.399      | -0.786  | 0.433   |
| ALA               | 4.133               | 5.276      | 0.783   | 0.434   |

*Table C7: Male Subgroup, Outcome Waist-to-height ratio*

|                   | Coefficient $\beta$ | Std. Error | t-Value | p-Value |
|-------------------|---------------------|------------|---------|---------|
| Omega-3 Index (%) | -0.003              | 0.003      | -0.959  | 0.339   |
| ALA               | -0.021              | 0.036      | -0.564  | 0.573   |

*Table C8: Male Subgroup, Outcome E/e'*

|                   | Coefficient $\beta$ | Std. Error | t-Value | p-Value |
|-------------------|---------------------|------------|---------|---------|
| Omega-3 Index (%) | -0.069              | 0.071      | -0.966  | 0.335   |
| ALA               | 1.016               | 0.940      | 1.080   | 0.281   |

*Table C9: Male Subgroup, Outcome E/A velocity ratio*

|                   | Coefficient $\beta$ | Std. Error | t-Value | p-Value |
|-------------------|---------------------|------------|---------|---------|
| Omega-3 Index (%) | 0.005               | 0.015      | 0.340   | 0.734   |
| ALA               | -0.142              | 0.205      | -0.692  | 0.490   |

*Table C10: Male Subgroup, Outcome Deceleration time, ms*

|                   | Coefficient $\beta$ | Std. Error | t-Value | p-Value |
|-------------------|---------------------|------------|---------|---------|
| Omega-3 Index (%) | -0.313              | 2.963      | -0.106  | 0.916   |
| ALA               | 6.479               | 39.206     | 0.165   | 0.869   |

*Table C11: Male Subgroup, Outcome NT-proBNP, ng/L*

|                   | Coefficient $\beta$ | Std. Error | t-Value | p-Value |
|-------------------|---------------------|------------|---------|---------|
| Omega-3 Index (%) | 0.030               | 0.021      | 1.417   | 0.158   |
| ALA               | 0.415               | 0.275      | 1.508   | 0.133   |

*Table C12: Male Subgroup, Outcome Follow-Up HbA1c*

|                   | Coefficient $\beta$ | Std. Error | t-Value | p-Value |
|-------------------|---------------------|------------|---------|---------|
| Omega-3 Index (%) | -0.011              | 0.058      | -0.196  | 0.845   |
| ALA               | 0.702               | 0.763      | 0.919   | 0.359   |

*Table C13: Male Subgroup, Outcome Follow-Up TG/HDL-C ratio*

|                   | Coefficient $\beta$ | Std. Error | t-Value | p-Value |
|-------------------|---------------------|------------|---------|---------|
| Omega-3 Index (%) | -0.310              | 0.252      | -1.230  | 0.220   |
| ALA               | 6.238               | 3.309      | 1.885   | 0.061   |

*Table C14: Male Subgroup, Outcome Follow-Up Triglycerides (mg/dl)*

|                   | Coefficient $\beta$ | Std. Error | t-Value | p-Value |
|-------------------|---------------------|------------|---------|---------|
| Omega-3 Index (%) | -9.299              | 6.880      | -1.352  | 0.178   |
| ALA               | 145.384             | 90.229     | 1.611   | 0.109   |

*Table C15: Male Subgroup, Outcome Follow-Up Non-HDL-C (mg/dl)*

|                   | Coefficient $\beta$ | Std. Error | t-Value | p-Value |
|-------------------|---------------------|------------|---------|---------|
| Omega-3 Index (%) | -6.764              | 2.091      | -3.235  | 0.001   |
| ALA               | -7.254              | 27.422     | -0.265  | 0.792   |

*Table C16: Male Subgroup, Outcome Follow-Up Body mass index*

|                   | Coefficient $\beta$ | Std. Error | t-Value | p-Value |
|-------------------|---------------------|------------|---------|---------|
| Omega-3 Index (%) | -0.184              | 0.167      | -1.105  | 0.271   |
| ALA               | -0.633              | 2.203      | -0.287  | 0.774   |

*Table C17: Male Subgroup, Outcome Follow-Up Waist Circumference, (cm)*

|                   | Coefficient $\beta$ | Std. Error | t-Value | p-Value |
|-------------------|---------------------|------------|---------|---------|
| Omega-3 Index (%) | -0.443              | 0.462      | -0.959  | 0.339   |
| ALA               | 0.140               | 6.092      | 0.023   | 0.982   |

*Table C18: Male Subgroup, Outcome Follow-Up Waist-to-height ratio*

|                   | Coefficient $\beta$ | Std. Error | t-Value | p-Value |
|-------------------|---------------------|------------|---------|---------|
| Omega-3 Index (%) | -0.002              | 0.003      | -0.800  | 0.425   |
| ALA               | 0.011               | 0.033      | 0.317   | 0.752   |

*Table C19: Male Subgroup, Outcome Follow-Up E/e'*

|                   | Coefficient $\beta$ | Std. Error | t-Value | p-Value |
|-------------------|---------------------|------------|---------|---------|
| Omega-3 Index (%) | -0.157              | 0.075      | -2.082  | 0.039   |
| ALA               | 0.873               | 0.998      | 0.874   | 0.383   |

*Table C20: Male Subgroup, Outcome Follow-Up E/A velocity ratio*

|                   | Coefficient $\beta$ | Std. Error | t-Value | p-Value |
|-------------------|---------------------|------------|---------|---------|
| Omega-3 Index (%) | -0.007              | 0.015      | -0.465  | 0.642   |
| ALA               | -0.013              | 0.196      | -0.069  | 0.945   |

*Table C21: Male Subgroup, Outcome Follow-Up Deceleration time, ms*

|                   | Coefficient $\beta$ | Std. Error | t-Value | p-Value |
|-------------------|---------------------|------------|---------|---------|
| Omega-3 Index (%) | 5.689               | 3.077      | 1.849   | 0.066   |
| ALA               | 7.081               | 40.752     | 0.174   | 0.862   |

*Table C22: Male Subgroup, Outcome Follow-Up NT-proBNP, ng/L*

|                   | Coefficient $\beta$ | Std. Error | t-Value | p-Value |
|-------------------|---------------------|------------|---------|---------|
| Omega-3 Index (%) | 0.051               | 0.055      | 0.930   | 0.354   |
| ALA               | 0.974               | 0.704      | 1.384   | 0.168   |

*Table C23: Male Subgroup, Outcome Systolic blood pressure, mm Hg*

|                   | Coefficient $\beta$ | Std. Error | t-Value | p-Value |
|-------------------|---------------------|------------|---------|---------|
| Omega-3 Index (%) | 0.035               | 0.828      | 0.042   | 0.966   |
| ALA               | -0.933              | 10.951     | -0.085  | 0.932   |

*Table C24: Male Subgroup, Outcome Diastolic blood pressure, mm Hg*

|                   | Coefficient $\beta$ | Std. Error | t-Value | p-Value |
|-------------------|---------------------|------------|---------|---------|
| Omega-3 Index (%) | -0.721              | 0.513      | -1.407  | 0.161   |
| ALA               | -9.134              | 6.787      | -1.346  | 0.180   |



Table C25: Male Subgroup, Outcome Heart rate, min

|                   | Coefficient $\beta$ | Std. Error | t-Value | p-Value |
|-------------------|---------------------|------------|---------|---------|
| Omega-3 Index (%) | -1.205              | 0.495      | -2.432  | 0.016   |
| ALA               | 2.890               | 6.555      | 0.441   | 0.660   |

Table C26: Male Subgroup, Outcome 6 MWT, (Distance covered) meters

|                   | Coefficient $\beta$ | Std. Error | t-Value | p-Value |
|-------------------|---------------------|------------|---------|---------|
| Omega-3 Index (%) | 5.233               | 3.231      | 1.620   | 0.107   |
| ALA               | -13.283             | 42.749     | -0.311  | 0.756   |

Table C27: Male Subgroup, Outcome LDL-C (mg/dl)

|                   | Coefficient $\beta$ | Std. Error | t-Value | p-Value |
|-------------------|---------------------|------------|---------|---------|
| Omega-3 Index (%) | -3.960              | 1.826      | -2.168  | 0.031   |
| ALA               | -3.003              | 23.911     | -0.126  | 0.900   |

Table C28: Male Subgroup, Outcome ASAT

|                   | Coefficient $\beta$ | Std. Error | t-Value | p-Value |
|-------------------|---------------------|------------|---------|---------|
| Omega-3 Index (%) | -0.430              | 0.479      | -0.898  | 0.371   |
| ALA               | -0.911              | 6.320      | -0.144  | 0.886   |

Table C29: Male Subgroup, Outcome ALAT

|                   | Coefficient $\beta$ | Std. Error | t-Value | p-Value |
|-------------------|---------------------|------------|---------|---------|
| Omega-3 Index (%) | -0.523              | 0.757      | -0.691  | 0.490   |
| ALA               | -11.092             | 9.983      | -1.111  | 0.268   |

Table C30: Male Subgroup, Outcome GGT

|                   | Coefficient $\beta$ | Std. Error | t-Value | p-Value |
|-------------------|---------------------|------------|---------|---------|
| Omega-3 Index (%) | -4.165              | 1.887      | -2.207  | 0.029   |
| ALA               | -10.301             | 24.878     | -0.414  | 0.679   |

*Table C31: Male Subgroup, Outcome LV ejection fraction, %*

|                   | Coefficient $\beta$ | Std. Error | t-Value | p-Value |
|-------------------|---------------------|------------|---------|---------|
| Omega-3 Index (%) | 0.570               | 0.347      | 1.642   | 0.102   |
| ALA               | -0.102              | 4.595      | -0.022  | 0.982   |

*Table C32: Male Subgroup, Outcome VO2peak*

|                   | Coefficient $\beta$ | Std. Error | t-Value | p-Value |
|-------------------|---------------------|------------|---------|---------|
| Omega-3 Index (%) | -0.040              | 0.144      | -0.277  | 0.782   |
| ALA               | 1.277               | 1.912      | 0.668   | 0.505   |

*Table C33: Male Subgroup, Outcome Follow-Up Systolic blood pressure, mm Hg*

|                   | Coefficient $\beta$ | Std. Error | t-Value | p-Value |
|-------------------|---------------------|------------|---------|---------|
| Omega-3 Index (%) | -0.530              | 0.785      | -0.675  | 0.500   |
| ALA               | 4.248               | 10.365     | 0.410   | 0.682   |

*Table C34: Male Subgroup, Outcome Follow-Up Diastolic blood pressure, mm Hg*

|                   | Coefficient $\beta$ | Std. Error | t-Value | p-Value |
|-------------------|---------------------|------------|---------|---------|
| Omega-3 Index (%) | -1.295              | 0.529      | -2.448  | 0.015   |
| ALA               | -3.993              | 6.981      | -0.572  | 0.568   |

*Table C35: Male Subgroup, Outcome Follow-Up Heart rate, min*

|                   | Coefficient $\beta$ | Std. Error | t-Value | p-Value |
|-------------------|---------------------|------------|---------|---------|
| Omega-3 Index (%) | -1.260              | 0.551      | -2.285  | 0.023   |
| ALA               | 4.352               | 7.275      | 0.598   | 0.550   |

*Table C36: Male Subgroup, Outcome Follow-Up 6 MWT, (Distance covered) meters*

|                   | Coefficient $\beta$ | Std. Error | t-Value | p-Value |
|-------------------|---------------------|------------|---------|---------|
| Omega-3 Index (%) | 9.098               | 4.453      | 2.043   | 0.043   |
| ALA               | -65.512             | 59.154     | -1.107  | 0.270   |

*Table C37: Male Subgroup, Outcome Follow-Up LDL-C (mg/dl)*

|                   | Coefficient $\beta$ | Std. Error | t-Value | p-Value |
|-------------------|---------------------|------------|---------|---------|
| Omega-3 Index (%) | -4.383              | 1.868      | -2.347  | 0.020   |
| ALA               | -21.488             | 24.492     | -0.877  | 0.382   |

*Table C38: Male Subgroup, Outcome Follow-Up ASAT*

|                   | Coefficient $\beta$ | Std. Error | t-Value | p-Value |
|-------------------|---------------------|------------|---------|---------|
| Omega-3 Index (%) | -0.276              | 0.458      | -0.604  | 0.547   |
| ALA               | 1.446               | 6.003      | 0.241   | 0.810   |

*Table C39: Male Subgroup, Outcome Follow-Up ALAT*

|                   | Coefficient $\beta$ | Std. Error | t-Value | p-Value |
|-------------------|---------------------|------------|---------|---------|
| Omega-3 Index (%) | -0.742              | 0.723      | -1.027  | 0.306   |
| ALA               | -6.997              | 9.480      | -0.738  | 0.461   |

*Table C40: Male Subgroup, Outcome Follow-Up GGT*

|                   | Coefficient $\beta$ | Std. Error | t-Value | p-Value |
|-------------------|---------------------|------------|---------|---------|
| Omega-3 Index (%) | -1.965              | 1.876      | -1.048  | 0.296   |
| ALA               | 0.915               | 24.600     | 0.037   | 0.970   |

*Table C41: Male Subgroup, Outcome Follow-Up LV ejection fraction, %*

|                   | Coefficient $\beta$ | Std. Error | t-Value | p-Value |
|-------------------|---------------------|------------|---------|---------|
| Omega-3 Index (%) | 0.220               | 0.396      | 0.556   | 0.579   |
| ALA               | 6.286               | 5.239      | 1.200   | 0.232   |

*Table C42: Male Subgroup, Outcome Follow-Up VO2peak*

|                   | Coefficient $\beta$ | Std. Error | t-Value | p-Value |
|-------------------|---------------------|------------|---------|---------|
| Omega-3 Index (%) | 0.192               | 0.220      | 0.872   | 0.384   |
| ALA               | 2.423               | 2.905      | 0.834   | 0.405   |

*Table D1: Male Subgroup, Outcome HbA1c*

|     | Coefficient $\beta$ | Std. Error | t-Value | p-Value |
|-----|---------------------|------------|---------|---------|
| ALA | -0.407              | 0.534      | -0.762  | 0.447   |
| EPA | 0.089               | 0.169      | 0.529   | 0.597   |
| DHA | -0.122              | 0.069      | -1.778  | 0.077   |

*Table D2: Male Subgroup, Outcome TG/HDL-C ratio*

|     | Coefficient $\beta$ | Std. Error | t-Value | p-Value |
|-----|---------------------|------------|---------|---------|
| ALA | 7.952               | 1.844      | 4.311   | <0.001  |
| EPA | -1.701              | 0.580      | -2.934  | 0.004   |
| DHA | -0.088              | 0.232      | -0.377  | 0.707   |

*Table D3: Male Subgroup, Outcome Triglycerides (mg/dl)*

|     | Coefficient $\beta$ | Std. Error | t-Value | p-Value |
|-----|---------------------|------------|---------|---------|
| ALA | 265.859             | 66.230     | 4.014   | <0.001  |
| EPA | -47.174             | 20.817     | -2.266  | 0.025   |
| DHA | -9.394              | 8.334      | -1.127  | 0.261   |

*Table D4: Male Subgroup, Outcome Non-HDL-C (mg/dl)*

|     | Coefficient $\beta$ | Std. Error | t-Value | p-Value |
|-----|---------------------|------------|---------|---------|
| ALA | 3.302               | 27.755     | 0.119   | 0.905   |
| EPA | -0.337              | 8.741      | -0.039  | 0.969   |
| DHA | -8.490              | 3.478      | -2.441  | 0.016   |

*Table D5: Male Subgroup, Outcome Body mass index*

|     | Coefficient $\beta$ | Std. Error | t-Value | p-Value |
|-----|---------------------|------------|---------|---------|
| ALA | -0.596              | 2.021      | -0.295  | 0.768   |
| EPA | -0.485              | 0.636      | -0.762  | 0.447   |
| DHA | -0.032              | 0.253      | -0.128  | 0.898   |

*Table D6: Male Subgroup, Outcome Waist Circumference, (cm)*

|     | Coefficient $\beta$ | Std. Error | t-Value | p-Value |
|-----|---------------------|------------|---------|---------|
| ALA | 4.634               | 5.538      | 0.837   | 0.404   |
| EPA | -0.847              | 1.744      | -0.486  | 0.628   |
| DHA | -0.164              | 0.693      | -0.237  | 0.813   |

*Table D7: Male Subgroup, Outcome Waist-to-height ratio*

|     | Coefficient $\beta$ | Std. Error | t-Value | p-Value |
|-----|---------------------|------------|---------|---------|
| ALA | -0.012              | 0.038      | -0.310  | 0.757   |
| EPA | -0.012              | 0.012      | -0.977  | 0.330   |
| DHA | 0.000               | 0.005      | 0.024   | 0.981   |

*Table D8: Male Subgroup, Outcome E/e'*

|     | Coefficient $\beta$ | Std. Error | t-Value | p-Value |
|-----|---------------------|------------|---------|---------|
| ALA | 1.276               | 0.985      | 1.295   | 0.197   |
| EPA | -0.340              | 0.310      | -1.096  | 0.274   |
| DHA | 0.014               | 0.123      | 0.114   | 0.909   |

*Table D9: Male Subgroup, Outcome E/A velocity ratio*

|     | Coefficient $\beta$ | Std. Error | t-Value | p-Value |
|-----|---------------------|------------|---------|---------|
| ALA | -0.215              | 0.214      | -1.002  | 0.318   |
| EPA | 0.079               | 0.067      | 1.180   | 0.240   |
| DHA | -0.018              | 0.026      | -0.690  | 0.491   |

*Table D10: Male Subgroup, Outcome Deceleration time, ms*

|     | Coefficient $\beta$ | Std. Error | t-Value | p-Value |
|-----|---------------------|------------|---------|---------|
| ALA | 31.946              | 40.690     | 0.785   | 0.433   |
| EPA | -26.528             | 12.814     | -2.070  | 0.040   |
| DHA | 8.161               | 5.088      | 1.604   | 0.110   |

*Table D11: Male Subgroup, Outcome NT-proBNP, ng/L*

|     | Coefficient $\beta$ | Std. Error | t-Value | p-Value |
|-----|---------------------|------------|---------|---------|
| ALA | 0.374               | 0.289      | 1.296   | 0.197   |
| EPA | 0.073               | 0.091      | 0.806   | 0.421   |
| DHA | 0.018               | 0.037      | 0.489   | 0.626   |

*Table D12: Male Subgroup, Outcome Follow-Up HbA1c*

|     | Coefficient $\beta$ | Std. Error | t-Value | p-Value |
|-----|---------------------|------------|---------|---------|
| ALA | 0.802               | 0.810      | 0.991   | 0.323   |
| EPA | -0.101              | 0.243      | -0.417  | 0.677   |
| DHA | 0.017               | 0.099      | 0.173   | 0.863   |

*Table D13: Male Subgroup, Outcome Follow-Up TG/HDL-C ratio*

|     | Coefficient $\beta$ | Std. Error | t-Value | p-Value |
|-----|---------------------|------------|---------|---------|
| ALA | 6.106               | 3.510      | 1.740   | 0.084   |
| EPA | -0.210              | 1.054      | -0.199  | 0.842   |
| DHA | -0.367              | 0.429      | -0.857  | 0.393   |

*Table D14: Male Subgroup, Outcome Follow-Up Triglycerides (mg/dl)*

|     | Coefficient $\beta$ | Std. Error | t-Value | p-Value |
|-----|---------------------|------------|---------|---------|
| ALA | 131.188             | 95.661     | 1.371   | 0.172   |
| EPA | 2.807               | 28.718     | 0.098   | 0.922   |
| DHA | -13.989             | 11.680     | -1.198  | 0.233   |

*Table D15: Male Subgroup, Outcome Follow-Up Non-HDL-C (mg/dl)*

|     | Coefficient $\beta$ | Std. Error | t-Value | p-Value |
|-----|---------------------|------------|---------|---------|
| ALA | -3.400              | 29.076     | -0.117  | 0.907   |
| EPA | -10.588             | 8.729      | -1.213  | 0.227   |
| DHA | -6.028              | 3.550      | -1.698  | 0.091   |

*Table D16: Male Subgroup, Outcome Follow-Up Body mass index*

|     | Coefficient $\beta$ | Std. Error | t-Value | p-Value |
|-----|---------------------|------------|---------|---------|
| ALA | -0.655              | 2.337      | -0.280  | 0.780   |
| EPA | -0.175              | 0.704      | -0.249  | 0.804   |
| DHA | -0.201              | 0.284      | -0.709  | 0.479   |

*Table D17: Male Subgroup, Outcome Follow-Up Waist Circumference, (cm)*

|     | Coefficient $\beta$ | Std. Error | t-Value | p-Value |
|-----|---------------------|------------|---------|---------|
| ALA | -0.651              | 6.462      | -0.101  | 0.920   |
| EPA | 0.237               | 1.947      | 0.122   | 0.903   |
| DHA | -0.699              | 0.786      | -0.889  | 0.375   |

*Table D18: Male Subgroup, Outcome Follow-Up Waist-to-height ratio*

|     | Coefficient $\beta$ | Std. Error | t-Value | p-Value |
|-----|---------------------|------------|---------|---------|
| ALA | 0.001               | 0.035      | 0.032   | 0.975   |
| EPA | 0.006               | 0.011      | 0.591   | 0.556   |
| DHA | -0.005              | 0.004      | -1.138  | 0.257   |

*Table D19: Male Subgroup, Outcome Follow-Up E/e'*

|     | Coefficient $\beta$ | Std. Error | t-Value | p-Value |
|-----|---------------------|------------|---------|---------|
| ALA | 0.492               | 1.055      | 0.467   | 0.641   |
| EPA | 0.173               | 0.317      | 0.546   | 0.585   |
| DHA | -0.277              | 0.128      | -2.163  | 0.032   |

*Table D20: Male Subgroup, Outcome Follow-Up E/A velocity ratio*

|     | Coefficient $\beta$ | Std. Error | t-Value | p-Value |
|-----|---------------------|------------|---------|---------|
| ALA | -0.002              | 0.208      | -0.007  | 0.994   |
| EPA | -0.018              | 0.063      | -0.285  | 0.776   |
| DHA | -0.004              | 0.025      | -0.149  | 0.882   |

*Table D21: Male Subgroup, Outcome Follow-Up Deceleration time, ms*

|     | Coefficient $\beta$ | Std. Error | t-Value | p-Value |
|-----|---------------------|------------|---------|---------|
| ALA | 27.044              | 42.980     | 0.629   | 0.530   |
| EPA | -11.783             | 12.904     | -0.913  | 0.362   |
| DHA | 11.828              | 5.211      | 2.270   | 0.024   |

*Table D22: Male Subgroup, Outcome Follow-Up NT-proBNP, ng/L*

|     | Coefficient $\beta$ | Std. Error | t-Value | p-Value |
|-----|---------------------|------------|---------|---------|
| ALA | 0.832               | 0.743      | 1.121   | 0.264   |
| EPA | 0.191               | 0.231      | 0.824   | 0.411   |
| DHA | 0.009               | 0.094      | 0.095   | 0.924   |

*Table D23: Male Subgroup, Outcome Systolic blood pressure, mm Hg*

|     | Coefficient $\beta$ | Std. Error | t-Value | p-Value |
|-----|---------------------|------------|---------|---------|
| ALA | -3.145              | 11.486     | -0.274  | 0.785   |
| EPA | 2.313               | 3.617      | 0.639   | 0.523   |
| DHA | -0.701              | 1.436      | -0.488  | 0.626   |

*Table D24: Male Subgroup, Outcome Diastolic blood pressure, mm Hg*

|     | Coefficient $\beta$ | Std. Error | t-Value | p-Value |
|-----|---------------------|------------|---------|---------|
| ALA | -12.135             | 7.088      | -1.712  | 0.089   |
| EPA | 2.324               | 2.232      | 1.041   | 0.299   |
| DHA | -1.764              | 0.886      | -1.990  | 0.048   |

*Table D25: Male Subgroup, Outcome Heart rate, min*

|     | Coefficient $\beta$ | Std. Error | t-Value | p-Value |
|-----|---------------------|------------|---------|---------|
| ALA | 5.705               | 6.848      | 0.833   | 0.406   |
| EPA | -4.170              | 2.157      | -1.934  | 0.055   |
| DHA | -0.336              | 0.856      | -0.392  | 0.695   |



Table D26: Male Subgroup, Outcome 6 MWT, (Distance covered) meters

|     | Coefficient $\beta$ | Std. Error | t-Value | p-Value |
|-----|---------------------|------------|---------|---------|
| ALA | -9.651              | 44.880     | -0.215  | 0.830   |
| EPA | 1.799               | 14.133     | 0.127   | 0.899   |
| DHA | 6.747               | 5.612      | 1.202   | 0.231   |

Table D27: Male Subgroup, Outcome LDL-C (mg/dl)

|     | Coefficient $\beta$ | Std. Error | t-Value | p-Value |
|-----|---------------------|------------|---------|---------|
| ALA | -9.222              | 25.083     | -0.368  | 0.714   |
| EPA | 2.120               | 7.862      | 0.270   | 0.788   |
| DHA | -6.266              | 3.168      | -1.978  | 0.049   |

Table D28: Male Subgroup, Outcome ASAT

|     | Coefficient $\beta$ | Std. Error | t-Value | p-Value |
|-----|---------------------|------------|---------|---------|
| ALA | 0.450               | 6.628      | 0.068   | 0.946   |
| EPA | -1.855              | 2.087      | -0.889  | 0.375   |
| DHA | -0.001              | 0.830      | -0.001  | 0.999   |

Table D29: Male Subgroup, Outcome ALAT

|     | Coefficient $\beta$ | Std. Error | t-Value | p-Value |
|-----|---------------------|------------|---------|---------|
| ALA | -9.013              | 10.470     | -0.861  | 0.390   |
| EPA | -2.692              | 3.297      | -0.816  | 0.415   |
| DHA | 0.141               | 1.312      | 0.107   | 0.915   |

Table D30: Male Subgroup, Outcome GGT

|     | Coefficient $\beta$ | Std. Error | t-Value | p-Value |
|-----|---------------------|------------|---------|---------|
| ALA | -16.149             | 26.083     | -0.619  | 0.537   |
| EPA | 1.610               | 8.214      | 0.196   | 0.845   |
| DHA | -6.358              | 3.268      | -1.946  | 0.053   |

*Table D31: Male Subgroup, Outcome LV ejection fraction, %*

|     | Coefficient $\beta$ | Std. Error | t-Value | p-Value |
|-----|---------------------|------------|---------|---------|
| ALA | 1.817               | 4.802      | 0.378   | 0.706   |
| EPA | -1.371              | 1.512      | -0.907  | 0.366   |
| DHA | 1.243               | 0.600      | 2.071   | 0.040   |

*Table D32: Male Subgroup, Outcome VO2peak*

|     | Coefficient $\beta$ | Std. Error | t-Value | p-Value |
|-----|---------------------|------------|---------|---------|
| ALA | -0.510              | 1.959      | -0.260  | 0.795   |
| EPA | 1.796               | 0.617      | 2.911   | 0.004   |
| DHA | -0.638              | 0.245      | -2.606  | 0.010   |

*Table D33: Male Subgroup, Outcome Follow-Up Systolic blood pressure, mm Hg*

|     | Coefficient $\beta$ | Std. Error | t-Value | p-Value |
|-----|---------------------|------------|---------|---------|
| ALA | 0.578               | 10.967     | 0.053   | 0.958   |
| EPA | 2.711               | 3.304      | 0.820   | 0.413   |
| DHA | -1.629              | 1.334      | -1.221  | 0.224   |

*Table D34: Male Subgroup, Outcome Follow-Up Diastolic blood pressure, mm Hg*

|     | Coefficient $\beta$ | Std. Error | t-Value | p-Value |
|-----|---------------------|------------|---------|---------|
| ALA | -5.317              | 7.403      | -0.718  | 0.474   |
| EPA | -0.190              | 2.230      | -0.085  | 0.932   |
| DHA | -1.755              | 0.900      | -1.949  | 0.053   |

*Table D35: Male Subgroup, Outcome Follow-Up Heart rate, min*

|     | Coefficient $\beta$ | Std. Error | t-Value | p-Value |
|-----|---------------------|------------|---------|---------|
| ALA | 3.230               | 7.716      | 0.419   | 0.676   |
| EPA | -0.333              | 2.325      | -0.143  | 0.886   |
| DHA | -1.659              | 0.939      | -1.767  | 0.079   |

Table D36: Male Subgroup, Outcome Follow-Up 6 MWT, (Distance covered) meters

|     | Coefficient $\beta$ | Std. Error | t-Value | p-Value |
|-----|---------------------|------------|---------|---------|
| ALA | -45.008             | 62.430     | -0.721  | 0.472   |
| EPA | -9.012              | 18.765     | -0.480  | 0.632   |
| DHA | 15.722              | 7.584      | 2.073   | 0.040   |

Table D37: Male Subgroup, Outcome Follow-Up LDL-C (mg/dl)

|     | Coefficient $\beta$ | Std. Error | t-Value | p-Value |
|-----|---------------------|------------|---------|---------|
| ALA | -10.568             | 25.857     | -0.409  | 0.683   |
| EPA | -14.364             | 7.763      | -1.850  | 0.066   |
| DHA | -1.442              | 3.157      | -0.457  | 0.648   |

Table D38: Male Subgroup, Outcome Follow-Up ASAT

|     | Coefficient $\beta$ | Std. Error | t-Value | p-Value |
|-----|---------------------|------------|---------|---------|
| ALA | 4.224               | 6.335      | 0.667   | 0.506   |
| EPA | -2.766              | 1.902      | -1.455  | 0.148   |
| DHA | 0.520               | 0.773      | 0.673   | 0.502   |

Table D39: Male Subgroup, Outcome Follow-Up ALAT

|     | Coefficient $\beta$ | Std. Error | t-Value | p-Value |
|-----|---------------------|------------|---------|---------|
| ALA | -5.142              | 10.048     | -0.512  | 0.609   |
| EPA | -2.438              | 3.016      | -0.808  | 0.420   |
| DHA | -0.242              | 1.227      | -0.198  | 0.844   |

Table D40: Male Subgroup, Outcome Follow-Up GGT

|     | Coefficient $\beta$ | Std. Error | t-Value | p-Value |
|-----|---------------------|------------|---------|---------|
| ALA | -2.765              | 26.083     | -0.106  | 0.916   |
| EPA | 1.198               | 7.830      | 0.153   | 0.879   |
| DHA | -3.155              | 3.185      | -0.991  | 0.323   |

Table D41: Male Subgroup, Outcome Follow-Up LV ejection fraction, %

|     | Coefficient $\beta$ | Std. Error | t-Value | p-Value |
|-----|---------------------|------------|---------|---------|
| ALA | 6.914               | 5.556      | 1.244   | 0.215   |
| EPA | -0.327              | 1.668      | -0.196  | 0.845   |
| DHA | 0.415               | 0.674      | 0.617   | 0.538   |

Table D42: Male Subgroup, Outcome Follow-Up VO2peak

|     | Coefficient $\beta$ | Std. Error | t-Value | p-Value |
|-----|---------------------|------------|---------|---------|
| ALA | 0.966               | 3.066      | 0.315   | 0.753   |
| EPA | 1.501               | 0.927      | 1.620   | 0.107   |
| DHA | -0.232              | 0.380      | -0.611  | 0.542   |

Table E1: Female Subgroup, Outcome HbA1c

|                   | Coefficient $\beta$ | Std. Error | t-Value | p-Value |
|-------------------|---------------------|------------|---------|---------|
| Omega-3 Index (%) | -0.054              | 0.027      | -2.011  | 0.046   |
| ALA               | 0.024               | 0.335      | 0.072   | 0.943   |

Table E2: Female Subgroup, Outcome TG/HDL-C ratio

|                   | Coefficient $\beta$ | Std. Error | t-Value | p-Value |
|-------------------|---------------------|------------|---------|---------|
| Omega-3 Index (%) | -0.155              | 0.103      | -1.502  | 0.135   |
| ALA               | 4.042               | 1.351      | 2.991   | 0.003   |

Table E3: Female Subgroup, Outcome Triglycerides (mg/dl)

|                   | Coefficient $\beta$ | Std. Error | t-Value | p-Value |
|-------------------|---------------------|------------|---------|---------|
| Omega-3 Index (%) | -4.132              | 3.969      | -1.041  | 0.299   |
| ALA               | 147.024             | 51.832     | 2.837   | 0.005   |

Table E4: Female Subgroup, Outcome Non-HDL-C (mg/dl)

|                   | Coefficient $\beta$ | Std. Error | t-Value | p-Value |
|-------------------|---------------------|------------|---------|---------|
| Omega-3 Index (%) | 0.333               | 2.071      | 0.161   | 0.872   |
| ALA               | 5.121               | 26.030     | 0.197   | 0.844   |

Table E5: Female Subgroup, Outcome Body mass index

|                   | Coefficient $\beta$ | Std. Error | t-Value | p-Value |
|-------------------|---------------------|------------|---------|---------|
| Omega-3 Index (%) | -0.471              | 0.161      | -2.926  | 0.004   |
| ALA               | -1.655              | 2.042      | -0.810  | 0.419   |

Table E6: Female Subgroup, Outcome Waist Circumference, (cm)

|                   | Coefficient $\beta$ | Std. Error | t-Value | p-Value |
|-------------------|---------------------|------------|---------|---------|
| Omega-3 Index (%) | -1.417              | 0.427      | -3.320  | 0.001   |
| ALA               | 1.118               | 5.429      | 0.206   | 0.837   |

Table E7: Female Subgroup, Outcome Waist-to-height ratio

|                   | Coefficient $\beta$ | Std. Error | t-Value | p-Value |
|-------------------|---------------------|------------|---------|---------|
| Omega-3 Index (%) | -0.008              | 0.003      | -3.062  | 0.002   |
| ALA               | 0.004               | 0.033      | 0.112   | 0.911   |

Table E8: Female Subgroup, Outcome E/e'

|                   | Coefficient $\beta$ | Std. Error | t-Value | p-Value |
|-------------------|---------------------|------------|---------|---------|
| Omega-3 Index (%) | -0.014              | 0.064      | -0.223  | 0.824   |
| ALA               | 0.419               | 0.813      | 0.516   | 0.606   |

Table E9: Female Subgroup, Outcome E/A velocity ratio

|                   | Coefficient $\beta$ | Std. Error | t-Value | p-Value |
|-------------------|---------------------|------------|---------|---------|
| Omega-3 Index (%) | -0.016              | 0.014      | -1.146  | 0.253   |
| ALA               | 0.249               | 0.182      | 1.367   | 0.173   |

Table E10: Female Subgroup, Outcome Deceleration time, ms

|                   | Coefficient $\beta$ | Std. Error | t-Value | p-Value |
|-------------------|---------------------|------------|---------|---------|
| Omega-3 Index (%) | 1.730               | 2.503      | 0.691   | 0.490   |
| ALA               | -19.584             | 31.739     | -0.617  | 0.538   |

*Table E11: Female Subgroup, Outcome NT-proBNP, ng/L*

|                   | Coefficient $\beta$ | Std. Error | t-Value | p-Value |
|-------------------|---------------------|------------|---------|---------|
| Omega-3 Index (%) | 0.027               | 0.018      | 1.490   | 0.138   |
| ALA               | 0.722               | 0.225      | 3.212   | 0.002   |

*Table E12: Female Subgroup, Outcome Follow-Up HbA1c*

|                   | Coefficient $\beta$ | Std. Error | t-Value | p-Value |
|-------------------|---------------------|------------|---------|---------|
| Omega-3 Index (%) | -0.038              | 0.024      | -1.559  | 0.121   |
| ALA               | 0.064               | 0.297      | 0.216   | 0.829   |

*Table E13: Female Subgroup, Outcome Follow-Up TG/HDL-C ratio*

|                   | Coefficient $\beta$ | Std. Error | t-Value | p-Value |
|-------------------|---------------------|------------|---------|---------|
| Omega-3 Index (%) | -0.096              | 0.085      | -1.123  | 0.263   |
| ALA               | 1.069               | 1.054      | 1.015   | 0.311   |

*Table E14: Female Subgroup, Outcome Follow-Up Triglycerides (mg/dl)*

|                   | Coefficient $\beta$ | Std. Error | t-Value | p-Value |
|-------------------|---------------------|------------|---------|---------|
| Omega-3 Index (%) | 0.802               | 3.565      | 0.225   | 0.822   |
| ALA               | 26.607              | 43.907     | 0.606   | 0.545   |

*Table E15: Female Subgroup, Outcome Follow-Up Non-HDL-C (mg/dl)*

|                   | Coefficient $\beta$ | Std. Error | t-Value | p-Value |
|-------------------|---------------------|------------|---------|---------|
| Omega-3 Index (%) | 2.399               | 2.123      | 1.13    | 0.260   |
| ALA               | -24.685             | 26.261     | -0.94   | 0.348   |

*Table E16: Female Subgroup, Outcome Follow-Up Body mass index*

|                   | Coefficient $\beta$ | Std. Error | t-Value | p-Value |
|-------------------|---------------------|------------|---------|---------|
| Omega-3 Index (%) | -0.452              | 0.173      | -2.618  | 0.010   |
| ALA               | -1.302              | 2.127      | -0.612  | 0.541   |

Table E17: Female Subgroup, Outcome Follow-Up Waist Circumference, (cm)

|                   | Coefficient $\beta$ | Std. Error | t-Value | p-Value |
|-------------------|---------------------|------------|---------|---------|
| Omega-3 Index (%) | -1.644              | 0.449      | -3.663  | <0.001  |
| ALA               | -1.247              | 5.431      | -0.230  | 0.819   |

Table E18: Female Subgroup, Outcome Follow-Up Waist-to-height ratio

|                   | Coefficient $\beta$ | Std. Error | t-Value | p-Value |
|-------------------|---------------------|------------|---------|---------|
| Omega-3 Index (%) | -0.010              | 0.003      | -3.350  | 0.001   |
| ALA               | -0.046              | 0.035      | -1.315  | 0.190   |

Table E19: Female Subgroup, Outcome Follow-Up E/e'

|                   | Coefficient $\beta$ | Std. Error | t-Value | p-Value |
|-------------------|---------------------|------------|---------|---------|
| Omega-3 Index (%) | -0.063              | 0.078      | -0.815  | 0.416   |
| ALA               | 1.298               | 0.956      | 1.358   | 0.176   |

Table E20: Female Subgroup, Outcome Follow-Up E/A velocity ratio

|                   | Coefficient $\beta$ | Std. Error | t-Value | p-Value |
|-------------------|---------------------|------------|---------|---------|
| Omega-3 Index (%) | -0.009              | 0.016      | -0.568  | 0.570   |
| ALA               | 0.128               | 0.198      | 0.647   | 0.519   |

Table E21: Female Subgroup, Outcome Follow-Up Deceleration time, ms

|                   | Coefficient $\beta$ | Std. Error | t-Value | p-Value |
|-------------------|---------------------|------------|---------|---------|
| Omega-3 Index (%) | 4.848               | 2.760      | 1.757   | 0.081   |
| ALA               | 8.072               | 34.002     | 0.237   | 0.813   |

Table E22: Female Subgroup, Outcome Follow-Up NT-proBNP, ng/L

|                   | Coefficient $\beta$ | Std. Error | t-Value | p-Value |
|-------------------|---------------------|------------|---------|---------|
| Omega-3 Index (%) | 0.004               | 0.042      | 0.088   | 0.930   |
| ALA               | 2.033               | 0.509      | 3.996   | <0.001  |

Table E23: Female Subgroup, Outcome Systolic blood pressure, mm Hg

|                   | Coefficient $\beta$ | Std. Error | t-Value | p-Value |
|-------------------|---------------------|------------|---------|---------|
| Omega-3 Index (%) | -0.557              | 0.752      | -0.740  | 0.460   |
| ALA               | 8.719               | 9.534      | 0.914   | 0.362   |

Table E24: Female Subgroup, Outcome Diastolic blood pressure, mm Hg

|                   | Coefficient $\beta$ | Std. Error | t-Value | p-Value |
|-------------------|---------------------|------------|---------|---------|
| Omega-3 Index (%) | -0.257              | 0.429      | -0.598  | 0.550   |
| ALA               | -3.582              | 5.440      | -0.658  | 0.511   |

Table E25: Female Subgroup, Outcome Heart rate, min

|                   | Coefficient $\beta$ | Std. Error | t-Value | p-Value |
|-------------------|---------------------|------------|---------|---------|
| Omega-3 Index (%) | 1.098               | 0.484      | 2.269   | 0.024   |
| ALA               | 3.611               | 6.139      | 0.588   | 0.557   |

Table E26: Female Subgroup, Outcome 6 MWT, (Distance covered) meters

|                   | Coefficient $\beta$ | Std. Error | t-Value | p-Value |
|-------------------|---------------------|------------|---------|---------|
| Omega-3 Index (%) | 6.791               | 3.862      | 1.758   | 0.080   |
| ALA               | -33.443             | 50.533     | -0.662  | 0.509   |

Table E27: Female Subgroup, Outcome LDL-C (mg/dl)

|                   | Coefficient $\beta$ | Std. Error | t-Value | p-Value |
|-------------------|---------------------|------------|---------|---------|
| Omega-3 Index (%) | 2.397               | 1.833      | 1.308   | 0.192   |
| ALA               | -5.499              | 23.209     | -0.237  | 0.813   |

Table E28: Female Subgroup, Outcome ASAT

|                   | Coefficient $\beta$ | Std. Error | t-Value | p-Value |
|-------------------|---------------------|------------|---------|---------|
| Omega-3 Index (%) | -0.143              | 0.355      | -0.401  | 0.689   |
| ALA               | -1.241              | 4.499      | -0.276  | 0.783   |



*Table E29: Female Subgroup, Outcome ALAT*

|                   | Coefficient $\beta$ | Std. Error | t-Value | p-Value |
|-------------------|---------------------|------------|---------|---------|
| Omega-3 Index (%) | -0.643              | 0.521      | -1.235  | 0.218   |
| ALA               | -4.942              | 6.592      | -0.750  | 0.454   |

*Table E30: Female Subgroup, Outcome GGT*

|                   | Coefficient $\beta$ | Std. Error | t-Value | p-Value |
|-------------------|---------------------|------------|---------|---------|
| Omega-3 Index (%) | -1.530              | 1.556      | -0.983  | 0.327   |
| ALA               | 5.678               | 19.692     | 0.288   | 0.773   |

*Table E31: Female Subgroup, Outcome LV ejection fraction, %*

|                   | Coefficient $\beta$ | Std. Error | t-Value | p-Value |
|-------------------|---------------------|------------|---------|---------|
| Omega-3 Index (%) | 1.451               | 0.313      | 4.636   | <0.001  |
| ALA               | -4.859              | 3.968      | -1.225  | 0.222   |

*Table E32: Female Subgroup, Outcome VO2peak*

|                   | Coefficient $\beta$ | Std. Error | t-Value | p-Value |
|-------------------|---------------------|------------|---------|---------|
| Omega-3 Index (%) | 0.002               | 0.136      | 0.016   | 0.987   |
| ALA               | -2.359              | 1.731      | -1.363  | 0.174   |

*Table E33: Female Subgroup, Outcome Follow-Up Systolic blood pressure, mm Hg*

|                   | Coefficient $\beta$ | Std. Error | t-Value | p-Value |
|-------------------|---------------------|------------|---------|---------|
| Omega-3 Index (%) | -0.388              | 0.754      | -0.515  | 0.607   |
| ALA               | -0.708              | 9.208      | -0.077  | 0.939   |

*Table E34: Female Subgroup, Outcome Follow-Up Diastolic blood pressure, mm Hg*

|                   | Coefficient $\beta$ | Std. Error | t-Value | p-Value |
|-------------------|---------------------|------------|---------|---------|
| Omega-3 Index (%) | -0.341              | 0.430      | -0.793  | 0.429   |
| ALA               | -10.221             | 5.248      | -1.947  | 0.053   |

*Table E35: Female Subgroup, Outcome Follow-Up Heart rate, min*

|                   | Coefficient $\beta$ | Std. Error | t-Value | p-Value |
|-------------------|---------------------|------------|---------|---------|
| Omega-3 Index (%) | 0.023               | 0.464      | 0.049   | 0.961   |
| ALA               | -5.557              | 5.666      | -0.981  | 0.328   |

*Table E36: Female Subgroup, Outcome Follow-Up 6 MWT, (Distance covered) meters*

|                   | Coefficient $\beta$ | Std. Error | t-Value | p-Value |
|-------------------|---------------------|------------|---------|---------|
| Omega-3 Index (%) | 11.523              | 4.367      | 2.639   | 0.009   |
| ALA               | -8.661              | 51.745     | -0.167  | 0.867   |

*Table E37: Female Subgroup, Outcome Follow-Up LDL-C (mg/dl)*

|                   | Coefficient $\beta$ | Std. Error | t-Value | p-Value |
|-------------------|---------------------|------------|---------|---------|
| Omega-3 Index (%) | 3.693               | 1.880      | 1.964   | 0.051   |
| ALA               | -23.533             | 23.117     | -1.018  | 0.310   |

*Table E38: Female Subgroup, Outcome Follow-Up ASAT*

|                   | Coefficient $\beta$ | Std. Error | t-Value | p-Value |
|-------------------|---------------------|------------|---------|---------|
| Omega-3 Index (%) | 0.008               | 0.389      | 0.022   | 0.983   |
| ALA               | 1.816               | 4.755      | 0.382   | 0.703   |

*Table E39: Female Subgroup, Outcome Follow-Up ALAT*

|                   | Coefficient $\beta$ | Std. Error | t-Value | p-Value |
|-------------------|---------------------|------------|---------|---------|
| Omega-3 Index (%) | -0.467              | 0.532      | -0.877  | 0.382   |
| ALA               | 0.046               | 6.540      | 0.007   | 0.994   |

*Table E40: Female Subgroup, Outcome Follow-Up GGT*

|                   | Coefficient $\beta$ | Std. Error | t-Value | p-Value |
|-------------------|---------------------|------------|---------|---------|
| Omega-3 Index (%) | 0.131               | 1.575      | 0.083   | 0.934   |
| ALA               | 6.673               | 19.232     | 0.347   | 0.729   |

*Table E41: Female Subgroup, Outcome Follow-Up LV ejection fraction, %*

|                   | Coefficient $\beta$ | Std. Error | t-Value | p-Value |
|-------------------|---------------------|------------|---------|---------|
| Omega-3 Index (%) | 1.111               | 0.324      | 3.428   | 0.001   |
| ALA               | -4.594              | 3.992      | -1.151  | 0.251   |

*Table E42: Female Subgroup, Outcome Follow-Up VO2peak*

|                   | Coefficient $\beta$ | Std. Error | t-Value | p-Value |
|-------------------|---------------------|------------|---------|---------|
| Omega-3 Index (%) | 0.266               | 0.181      | 1.471   | 0.143   |
| ALA               | -1.484              | 2.258      | -0.658  | 0.512   |

*Table F1: Female Subgroup, Outcome HbA1c*

|     | Coefficient $\beta$ | Std. Error | t-Value | p-Value |
|-----|---------------------|------------|---------|---------|
| ALA | -0.072              | 0.345      | -0.208  | 0.836   |
| EPA | 0.111               | 0.145      | 0.764   | 0.446   |
| DHA | -0.109              | 0.052      | -2.092  | 0.038   |

*Table F2: Female Subgroup, Outcome TG/HDL-C ratio*

|     | Coefficient $\beta$ | Std. Error | t-Value | p-Value |
|-----|---------------------|------------|---------|---------|
| ALA | 4.271               | 1.391      | 3.071   | 0.002   |
| EPA | -0.557              | 0.564      | -0.987  | 0.325   |
| DHA | -0.043              | 0.202      | -0.215  | 0.830   |

*Table F3: Female Subgroup, Outcome Triglycerides (mg/dl)*

|     | Coefficient $\beta$ | Std. Error | t-Value | p-Value |
|-----|---------------------|------------|---------|---------|
| ALA | 144.113             | 53.479     | 2.695   | 0.008   |
| EPA | 0.531               | 21.776     | 0.024   | 0.981   |
| DHA | -5.875              | 7.791      | -0.754  | 0.452   |

*Table F4: Female Subgroup, Outcome Non-HDL-C (mg/dl)*

|     | Coefficient $\beta$ | Std. Error | t-Value | p-Value |
|-----|---------------------|------------|---------|---------|
| ALA | -4.220              | 26.627     | -0.159  | 0.874   |
| EPA | 17.302              | 11.122     | 1.556   | 0.121   |
| DHA | -4.868              | 4.006      | -1.215  | 0.226   |

*Table F5: Female Subgroup, Outcome Body mass index*

|     | Coefficient $\beta$ | Std. Error | t-Value | p-Value |
|-----|---------------------|------------|---------|---------|
| ALA | -0.598              | 2.075      | -0.288  | 0.774   |
| EPA | -2.424              | 0.866      | -2.798  | 0.006   |
| DHA | 0.088               | 0.309      | 0.285   | 0.776   |

*Table F6: Female Subgroup, Outcome Waist Circumference, (cm)*

|     | Coefficient $\beta$ | Std. Error | t-Value | p-Value |
|-----|---------------------|------------|---------|---------|
| ALA | 3.676               | 5.534      | 0.664   | 0.507   |
| EPA | -6.094              | 2.305      | -2.644  | 0.009   |
| DHA | -0.100              | 0.821      | -0.122  | 0.903   |

*Table F7: Female Subgroup, Outcome Waist-to-height ratio*

|     | Coefficient $\beta$ | Std. Error | t-Value | p-Value |
|-----|---------------------|------------|---------|---------|
| ALA | 0.022               | 0.034      | 0.659   | 0.511   |
| EPA | -0.042              | 0.014      | -2.997  | 0.003   |
| DHA | 0.002               | 0.005      | 0.352   | 0.725   |

*Table F8: Female Subgroup, Outcome E/e'*

|     | Coefficient $\beta$ | Std. Error | t-Value | p-Value |
|-----|---------------------|------------|---------|---------|
| ALA | 0.605               | 0.834      | 0.725   | 0.469   |
| EPA | -0.353              | 0.348      | -1.014  | 0.312   |
| DHA | 0.088               | 0.124      | 0.706   | 0.481   |

*Table F9: Female Subgroup, Outcome E/A velocity ratio*

|     | Coefficient $\beta$ | Std. Error | t-Value | p-Value |
|-----|---------------------|------------|---------|---------|
| ALA | 0.228               | 0.187      | 1.220   | 0.224   |
| EPA | 0.022               | 0.076      | 0.289   | 0.773   |
| DHA | -0.029              | 0.027      | -1.059  | 0.291   |

*Table F10: Female Subgroup, Outcome Deceleration time, ms*

|     | Coefficient $\beta$ | Std. Error | t-Value | p-Value |
|-----|---------------------|------------|---------|---------|
| ALA | -19.628             | 32.650     | -0.601  | 0.548   |
| EPA | 1.911               | 13.632     | 0.140   | 0.889   |
| DHA | 1.805               | 4.860      | 0.371   | 0.711   |

*Table F11: Female Subgroup, Outcome NT-proBNP, ng/L*

|     | Coefficient $\beta$ | Std. Error | t-Value | p-Value |
|-----|---------------------|------------|---------|---------|
| ALA | 0.719               | 0.231      | 3.107   | 0.002   |
| EPA | 0.035               | 0.096      | 0.370   | 0.712   |
| DHA | 0.026               | 0.035      | 0.745   | 0.457   |

*Table F12: Female Subgroup, Outcome Follow-Up HbA1c*

|     | Coefficient $\beta$ | Std. Error | t-Value | p-Value |
|-----|---------------------|------------|---------|---------|
| ALA | 0.027               | 0.307      | 0.089   | 0.929   |
| EPA | 0.026               | 0.136      | 0.191   | 0.849   |
| DHA | -0.060              | 0.048      | -1.249  | 0.213   |

*Table F13: Female Subgroup, Outcome Follow-Up TG/HDL-C ratio*

|     | Coefficient $\beta$ | Std. Error | t-Value | p-Value |
|-----|---------------------|------------|---------|---------|
| ALA | 1.359               | 1.083      | 1.255   | 0.211   |
| EPA | -0.644              | 0.484      | -1.330  | 0.185   |
| DHA | 0.063               | 0.170      | 0.372   | 0.711   |

*Table F14: Female Subgroup, Outcome Follow-Up Triglycerides (mg/dl)*

|     | Coefficient $\beta$ | Std. Error | t-Value | p-Value |
|-----|---------------------|------------|---------|---------|
| ALA | 32.837              | 45.336     | 0.724   | 0.470   |
| EPA | -10.417             | 20.236     | -0.515  | 0.607   |
| DHA | 4.256               | 7.102      | 0.599   | 0.550   |

*Table F15: Female Subgroup, Outcome Follow-Up Non-HDL-C (mg/dl)*

|     | Coefficient $\beta$ | Std. Error | t-Value | p-Value |
|-----|---------------------|------------|---------|---------|
| ALA | -30.736             | 27.070     | -1.135  | 0.258   |
| EPA | 13.472              | 12.016     | 1.121   | 0.264   |
| DHA | -0.747              | 4.198      | -0.178  | 0.859   |

*Table F16: Female Subgroup, Outcome Follow-Up Body mass index*

|     | Coefficient $\beta$ | Std. Error | t-Value | p-Value |
|-----|---------------------|------------|---------|---------|
| ALA | -0.425              | 2.188      | -0.194  | 0.846   |
| EPA | -2.010              | 0.970      | -2.073  | 0.039   |
| DHA | -0.018              | 0.339      | -0.054  | 0.957   |

*Table F17: Female Subgroup, Outcome Follow-Up Waist Circumference, (cm)*

|     | Coefficient $\beta$ | Std. Error | t-Value | p-Value |
|-----|---------------------|------------|---------|---------|
| ALA | 1.055               | 5.594      | 0.189   | 0.851   |
| EPA | -5.658              | 2.473      | -2.288  | 0.023   |
| DHA | -0.544              | 0.878      | -0.620  | 0.536   |

*Table F18: Female Subgroup, Outcome Follow-Up Waist-to-height ratio*

|     | Coefficient $\beta$ | Std. Error | t-Value | p-Value |
|-----|---------------------|------------|---------|---------|
| ALA | -0.034              | 0.036      | -0.929  | 0.354   |
| EPA | -0.031              | 0.016      | -1.971  | 0.050   |
| DHA | -0.004              | 0.006      | -0.666  | 0.506   |

*Table F19: Female Subgroup, Outcome Follow-Up E/e'*

|     | Coefficient $\beta$ | Std. Error | t-Value | p-Value |
|-----|---------------------|------------|---------|---------|
| ALA | 1.251               | 0.989      | 1.265   | 0.207   |
| EPA | 0.015               | 0.438      | 0.034   | 0.973   |
| DHA | -0.091              | 0.153      | -0.596  | 0.552   |

*Table F20: Female Subgroup, Outcome Follow-Up E/A velocity ratio*

|     | Coefficient $\beta$ | Std. Error | t-Value | p-Value |
|-----|---------------------|------------|---------|---------|
| ALA | 0.085               | 0.204      | 0.416   | 0.678   |
| EPA | 0.069               | 0.089      | 0.771   | 0.442   |
| DHA | -0.033              | 0.031      | -1.057  | 0.292   |

*Table F21: Female Subgroup, Outcome Follow-Up Deceleration time, ms*

|     | Coefficient $\beta$ | Std. Error | t-Value | p-Value |
|-----|---------------------|------------|---------|---------|
| ALA | 0.384               | 35.129     | 0.011   | 0.991   |
| EPA | 18.568              | 15.571     | 1.192   | 0.235   |
| DHA | 1.095               | 5.440      | 0.201   | 0.841   |

*Table F22: Female Subgroup, Outcome Follow-Up NT-proBNP, ng/L*

|     | Coefficient $\beta$ | Std. Error | t-Value | p-Value |
|-----|---------------------|------------|---------|---------|
| ALA | 1.972               | 0.526      | 3.746   | <0.001  |
| EPA | 0.111               | 0.234      | 0.476   | 0.634   |
| DHA | -0.029              | 0.082      | -0.346  | 0.729   |

*Table F23: Female Subgroup, Outcome Systolic blood pressure, mm Hg*

|     | Coefficient $\beta$ | Std. Error | t-Value | p-Value |
|-----|---------------------|------------|---------|---------|
| ALA | 10.053              | 9.799      | 1.026   | 0.306   |
| EPA | -3.020              | 4.091      | -0.738  | 0.461   |
| DHA | 0.152               | 1.459      | 0.104   | 0.917   |

*Table F24: Female Subgroup, Outcome Diastolic blood pressure, mm Hg*

|     | Coefficient $\beta$ | Std. Error | t-Value | p-Value |
|-----|---------------------|------------|---------|---------|
| ALA | -2.804              | 5.591      | -0.501  | 0.617   |
| EPA | -1.690              | 2.335      | -0.724  | 0.470   |
| DHA | 0.160               | 0.832      | 0.193   | 0.847   |

*Table F25: Female Subgroup, Outcome Heart rate, min*

|     | Coefficient $\beta$ | Std. Error | t-Value | p-Value |
|-----|---------------------|------------|---------|---------|
| ALA | 4.554               | 6.308      | 0.722   | 0.471   |
| EPA | -0.556              | 2.634      | -0.211  | 0.833   |
| DHA | 1.685               | 0.939      | 1.794   | 0.074   |

*Table F26: Female Subgroup, Outcome 6 MWT, (Distance covered) meters*

|     | Coefficient $\beta$ | Std. Error | t-Value | p-Value |
|-----|---------------------|------------|---------|---------|
| ALA | -43.622             | 51.993     | -0.839  | 0.402   |
| EPA | 24.558              | 21.037     | 1.167   | 0.244   |
| DHA | 1.892               | 7.498      | 0.252   | 0.801   |

*Table F27: Female Subgroup, Outcome LDL-C (mg/dl)*

|     | Coefficient $\beta$ | Std. Error | t-Value | p-Value |
|-----|---------------------|------------|---------|---------|
| ALA | -12.694             | 23.749     | -0.535  | 0.594   |
| EPA | 15.861              | 9.933      | 1.597   | 0.112   |
| DHA | -1.516              | 3.539      | -0.429  | 0.669   |

*Table F28: Female Subgroup, Outcome ASAT*

|     | Coefficient $\beta$ | Std. Error | t-Value | p-Value |
|-----|---------------------|------------|---------|---------|
| ALA | -3.010              | 4.602      | -0.654  | 0.514   |
| EPA | 3.028               | 1.934      | 1.566   | 0.119   |
| DHA | -1.126              | 0.692      | -1.627  | 0.105   |



*Table F29: Female Subgroup, Outcome ALAT*

|     | Coefficient $\beta$ | Std. Error | t-Value | p-Value |
|-----|---------------------|------------|---------|---------|
| ALA | -6.971              | 6.761      | -1.031  | 0.304   |
| EPA | 2.965               | 2.841      | 1.044   | 0.298   |
| DHA | -1.799              | 1.017      | -1.769  | 0.078   |

*Table F30: Female Subgroup, Outcome GGT*

|     | Coefficient $\beta$ | Std. Error | t-Value | p-Value |
|-----|---------------------|------------|---------|---------|
| ALA | -4.345              | 20.052     | -0.217  | 0.829   |
| EPA | 16.394              | 8.426      | 1.946   | 0.053   |
| DHA | -7.144              | 3.015      | -2.369  | 0.019   |

*Table F31: Female Subgroup, Outcome LV ejection fraction, %*

|     | Coefficient $\beta$ | Std. Error | t-Value | p-Value |
|-----|---------------------|------------|---------|---------|
| ALA | -4.011              | 4.073      | -0.985  | 0.326   |
| EPA | -0.010              | 1.701      | -0.006  | 0.995   |
| DHA | 2.005               | 0.606      | 3.307   | 0.001   |

*Table F32: Female Subgroup, Outcome VO2peak*

|     | Coefficient $\beta$ | Std. Error | t-Value | p-Value |
|-----|---------------------|------------|---------|---------|
| ALA | -3.080              | 1.767      | -1.744  | 0.083   |
| EPA | 1.318               | 0.738      | 1.787   | 0.075   |
| DHA | -0.398              | 0.263      | -1.515  | 0.131   |

*Table F33: Female Subgroup, Outcome Follow-Up Systolic blood pressure, mm Hg*

|     | Coefficient $\beta$ | Std. Error | t-Value | p-Value |
|-----|---------------------|------------|---------|---------|
| ALA | -1.322              | 9.536      | -0.139  | 0.890   |
| EPA | 0.650               | 4.214      | 0.154   | 0.878   |
| DHA | -0.731              | 1.482      | -0.493  | 0.622   |

Table F34: Female Subgroup, Outcome Follow-Up Diastolic blood pressure, mm Hg

|     | Coefficient $\beta$ | Std. Error | t-Value | p-Value |
|-----|---------------------|------------|---------|---------|
| ALA | -9.440              | 5.431      | -1.738  | 0.084   |
| EPA | -1.709              | 2.400      | -0.712  | 0.477   |
| DHA | 0.047               | 0.844      | 0.055   | 0.956   |

Table F35: Female Subgroup, Outcome Follow-Up Heart rate, min

|     | Coefficient $\beta$ | Std. Error | t-Value | p-Value |
|-----|---------------------|------------|---------|---------|
| ALA | -4.005              | 5.852      | -0.684  | 0.494   |
| EPA | -2.657              | 2.586      | -1.027  | 0.306   |
| DHA | 0.833               | 0.909      | 0.916   | 0.361   |

Table F36: Female Subgroup, Outcome Follow-Up 6 MWT, (Distance covered) meters

|     | Coefficient $\beta$ | Std. Error | t-Value | p-Value |
|-----|---------------------|------------|---------|---------|
| ALA | -34.453             | 53.544     | -0.643  | 0.521   |
| EPA | 53.299              | 24.029     | 2.218   | 0.028   |
| DHA | -0.293              | 8.508      | -0.034  | 0.973   |

Table F37: Female Subgroup, Outcome Follow-Up LDL-C (mg/dl)

|     | Coefficient $\beta$ | Std. Error | t-Value | p-Value |
|-----|---------------------|------------|---------|---------|
| ALA | -29.385             | 23.830     | -1.233  | 0.219   |
| EPA | 14.398              | 10.567     | 1.363   | 0.175   |
| DHA | 0.741               | 3.709      | 0.200   | 0.842   |

Table F38: Female Subgroup, Outcome Follow-Up ASAT

|     | Coefficient $\beta$ | Std. Error | t-Value | p-Value |
|-----|---------------------|------------|---------|---------|
| ALA | -0.499              | 4.877      | -0.102  | 0.919   |
| EPA | 4.055               | 2.163      | 1.875   | 0.062   |
| DHA | -1.205              | 0.757      | -1.592  | 0.113   |

*Table F39: Female Subgroup, Outcome Follow-Up ALAT*

|     | Coefficient $\beta$ | Std. Error | t-Value | p-Value |
|-----|---------------------|------------|---------|---------|
| ALA | -2.566              | 6.724      | -0.382  | 0.703   |
| EPA | 4.087               | 2.965      | 1.378   | 0.170   |
| DHA | -1.867              | 1.038      | -1.799  | 0.074   |

*Table F40: Female Subgroup, Outcome Follow-Up GGT*

|     | Coefficient $\beta$ | Std. Error | t-Value | p-Value |
|-----|---------------------|------------|---------|---------|
| ALA | -1.511              | 19.797     | -0.076  | 0.939   |
| EPA | 14.359              | 8.870      | 1.619   | 0.107   |
| DHA | -4.142              | 3.103      | -1.335  | 0.183   |

*Table F41: Female Subgroup, Outcome Follow-Up LV ejection fraction, %*

|     | Coefficient $\beta$ | Std. Error | t-Value | p-Value |
|-----|---------------------|------------|---------|---------|
| ALA | -1.840              | 4.057      | -0.453  | 0.651   |
| EPA | -3.639              | 1.799      | -2.023  | 0.044   |
| DHA | 2.620               | 0.628      | 4.169   | <0.001  |

*Table F42: Female Subgroup, Outcome Follow-Up VO2peak*

|     | Coefficient $\beta$ | Std. Error | t-Value | p-Value |
|-----|---------------------|------------|---------|---------|
| ALA | -2.023              | 2.327      | -0.869  | 0.386   |
| EPA | 1.244               | 1.023      | 1.216   | 0.225   |
| DHA | -0.009              | 0.358      | -0.026  | 0.979   |
